# Supplementary material for: Cscs encoding chorismate synthase is a candidate gene for leaf variegation mutation in cucumber
Source: PubMed Central journal article supplement — Breed Sci. 2018 Nov 17;68(5):571–81. doi: 10.1270/jsbbs.18023 (PMC6345225; doi:10.1270/jsbbs.18023), 2018-11-17
Supplement: 68_18023_1.pdf [file 68_18023_1.pdf]

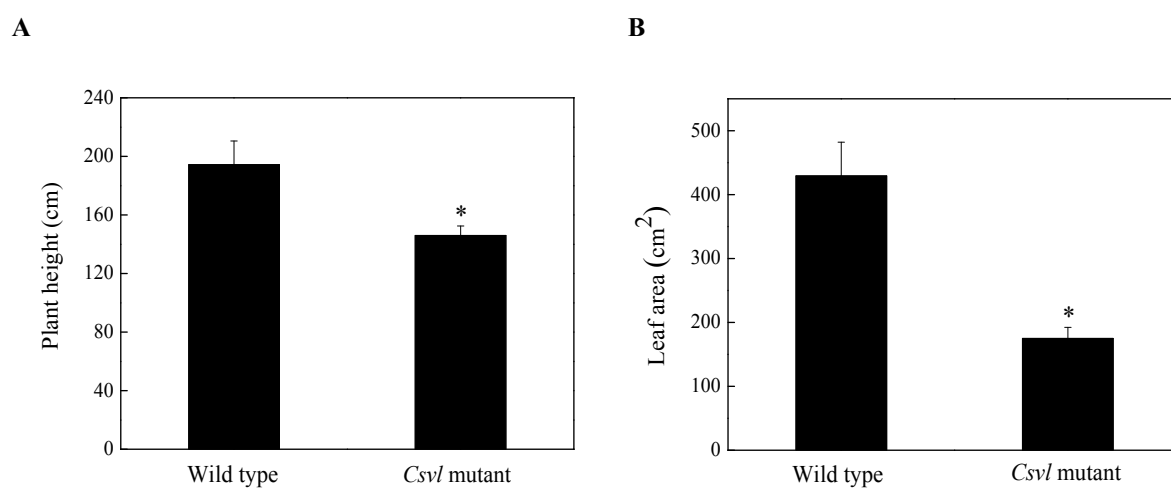

**Supplemental Fig. 1.** Comparison of the phenotype of wild type and variegated leaf mutant *Csvl* in cucumber. Plants colonized from wild type and *Csvl* mutant plants grown for 60 d. The leaves of the 7<sup>th</sup> node were selected for leaf area measurement. ‘\*’ indicate the significant difference of target between wild type and *Csvl* mutant with  $p$  value < 0.05. Data were presented as means  $\pm$  SD of five replicates.  $t$  test was conducted for statistical analysis.

|                             |                                                                                                    |     |
|-----------------------------|----------------------------------------------------------------------------------------------------|-----|
| <i>Cucumis sativus</i>      | MASSLSRPPFLSSRTEGFSGLTSLSTDLSKLSFAVKISVGSRNKKLQIKAAGSTFCNVFRVTTGESHGGGVGCVLDGCPRRRFLSEADLQVLDLDR   | 99  |
| <i>Cucumis melo</i>         | MASSLSRPPFLSSRTEGFSGLTSLSTDLSKLSFAVKISVGSRNKKLQIKAAGSTFCNVFRVTTGESHGGGVGCVLDGCPRRRFLSEADLQVLDLDR   | 99  |
| <i>Arabidopsis thaliana</i> | MASSLTSRSLSTKLGSL...SSIPSEERRLSSPAVQISLRTQTRKNFQIAAGSSVCTHFRVSTGESHGGGVGCVLDGCPRRRFLSEADLQVLDLDR   | 96  |
| <i>Momordica charantia</i>  | MASSLSRPPFLSSRTEGFSGLTSLSTDLSKLSFAVKISVGSRSZAKLQIKAAGSTFCNVFRVTTGESHGGGVGCVLDGCPRRRFLSEADLQVLDLDR  | 99  |
| <i>Theobroma cacao</i>      | MASSLTPRPFLLATKPN...SLSSDLCRLSFLSLHSVKKPRTHKKLQIKAAGSTFCNVFRVTTGESHGGGVGCVLDGCPRRRFLSEADLQVLDLDR   | 94  |
| <i>Gossypium raimondii</i>  | MASSLTPRPFLLATKPN...SLSSDLCRLSFLSLHSVKKPRTHKKLQIKAAGSTFCNVFRVTTGESHGGGVGCVLDGCPRRRFLSEADLQVLDLDR   | 94  |
| Consensus                   | mass k g sl l ls is k qi a gs g frv t geshggvgvc dgcpr p e diq ldr                                 |     |
| <i>Cucumis sativus</i>      | RRPGQSRIITPRKETDTCRILSGVINCITGTPIHVFVNPNDQRCIDYSEMSIAYRPSHADATYDMKYGRVWEGGRSSARETIGRVAAGVAKKILKE   | 199 |
| <i>Cucumis melo</i>         | RRPGQSRIITPRKETDTCRILSGVINCITGTPIHVFVNPNDQRCIDYSEMSIAYRPSHADATYDMKYGRVWEGGRSSARETIGRVAAGVAKKILKE   | 199 |
| <i>Arabidopsis thaliana</i> | RRPGQSRIITPRKETDTCRILSGVINCITGTPIHVFVNPNDQRCIDYSEMSIAYRPSHADATYDMKYGRVWEGGRSSARETIGRVAAGVAKKILKE   | 196 |
| <i>Momordica charantia</i>  | RRPGQSRIITPRKETDTCRILSGVINCITGTPIHVFVNPNDQRCIDYSEMSIAYRPSHADATYDMKYGRVWEGGRSSARETIGRVAAGVAKKILKE   | 199 |
| <i>Theobroma cacao</i>      | RRPGQSRIITPRKETDTCRILSGVINCITGTPIHVFVNPNDQRCIDYSEMSIAYRPSHADATYDMKYGRVWEGGRSSARETIGRVAAGVAKKILKE   | 194 |
| <i>Gossypium raimondii</i>  | RRPGQSRIITPRKETDTCRILSGVINCITGTPIHVFVNPNDQRCIDYSEMSIAYRPSHADATYDMKYGRVWEGGRSSARETIGRVAAGVAKKILKE   | 194 |
| Consensus                   | rrpgqsrittprketdctcr sgv g ttgtpihvfvpntdqrg dy ems ayrpsHADATYDMKYGRVWEGGRSSARETIGRVAAGVAKKILKE   |     |
| <i>Cucumis sativus</i>      | LAGTEVLAVVSQVYKVVLPDGSVDEHTLMECHESNIVRCFPEYAEKMAAIDAVRTRGDSGGVVTCIVRNAPRGLGSPVFDKLEAFKAVVLSLPAE    | 299 |
| <i>Cucumis melo</i>         | LAGTEVLAVVSQVYKVVLPDGSVDEHTLMECHESNIVRCFPEYAEKMAAIDAVRTRGDSGGVVTCIVRNAPRGLGSPVFDKLEAFKAVVLSLPAE    | 299 |
| <i>Arabidopsis thaliana</i> | FAGTEVLAVVSQVYKVVLPDGSVDEHTLMECHESNIVRCFPEYAEKMAAIDAVRTRGDSGGVVTCIVRNAPRGLGSPVFDKLEAFKAVVLSLPAE    | 296 |
| <i>Momordica charantia</i>  | LAGTEVLAVVSQVYKVVLPDGSVDEHTLMECHESNIVRCFPEYAEKMAAIDAVRTRGDSGGVVTCIVRNAPRGLGSPVFDKLEAFKAVVLSLPAE    | 299 |
| <i>Theobroma cacao</i>      | FAGTEVLAVVSQVYKVVLPDGSVDEHTLMECHESNIVRCFPEYAEKMAAIDAVRTRGDSGGVVTCIVRNAPRGLGSPVFDKLEAFKAVVLSLPAE    | 294 |
| <i>Gossypium raimondii</i>  | FAGTEVLAVVSQVYKVVLPDGSVDEHTLMECHESNIVRCFPEYAEKMAAIDAVRTRGDSGGVVTCIVRNAPRGLGSPVFDKLEAFKAVVLSLPAE    | 294 |
| Consensus                   | gte layvsqv vvlp v h q e nivrcp peyaekmiaaid vr g s gvvvtciv n p glg pvfdkleea aka slpa            |     |
| <i>Cucumis sativus</i>      | KGFEI GSGFAGTFLTGSEHND FWDENCRIRTVNRSGGIQGGISNGEINMRVAFKPTAFI GKKNVTVRKKEWDLIARCRHDCPVVPRVPMVEAM   | 399 |
| <i>Cucumis melo</i>         | KGFEI GSGFAGTFLTGSEHND FWDENCRIRTVNRSGGIQGGISNGEINMRVAFKPTAFI GKKNVTVRKKEWDLIARCRHDCPVVPRVPMVEAM   | 399 |
| <i>Arabidopsis thaliana</i> | KGFEI GSGFAGTFLTGSEHND FWDENCRIRTVNRSGGIQGGISNGEINMRVAFKPTAFI GKKNVTVRKKEWDLIARCRHDCPVVPRVPMVEAM   | 396 |
| <i>Momordica charantia</i>  | KGFEI GSGFAGTFLTGSEHND FWDENCRIRTVNRSGGIQGGISNGEINMRVAFKPTAFI GKKNVTVRKKEWDLIARCRHDCPVVPRVPMVEAM   | 399 |
| <i>Theobroma cacao</i>      | KGFEI GSGFAGTFLTGSEHND FWDENCRIRTVNRSGGIQGGISNGEINMRVAFKPTAFI GKKNVTVRKKEWDLIARCRHDCPVVPRVPMVEAM   | 394 |
| <i>Gossypium raimondii</i>  | KGFEI GSGFAGTFLTGSEHND FWDENCRIRTVNRSGGIQGGISNGEINMRVAFKPTAFI GKKNVTVRKKEWDLIARCRHDCPVVPRVPMVEAM   | 394 |
| Consensus                   | kgfe gsgf gtflltg ehnd f de g irt tnrsggiqggisnge i mrvafkpt ti kq tvtr k e e argndpcvvpvprvpmveam |     |
| <i>Cucumis sativus</i>      | VAVLVDPQLMACHGQCNLFFPINPELCEELSFVGVSKTTV                                                           | 439 |
| <i>Cucumis melo</i>         | VAVLVDPQLMACHGQCNLFFPINPELCEELSFVGVSKTTV                                                           | 439 |
| <i>Arabidopsis thaliana</i> | VAVLVDPQLMACHGQCNLFFPINPELCEELQIQEQNATAL                                                           | 436 |
| <i>Momordica charantia</i>  | VAVLVDPQLMACHGQCNLFFPINPELCEELSFVGVSKTTV                                                           | 439 |
| <i>Theobroma cacao</i>      | VAVLVDPQLMACHGQCNLFFPINPELCEELSLNFFNFEFAN                                                          | 434 |
| <i>Gossypium raimondii</i>  | VAVLVDPQLMACHGQCNLFFPINPELCEELSFVGVSKTTV                                                           | 434 |
| Consensus                   | v vl dqImaq qc lfpin lq                                                                            |     |

**Supplemental Fig. 2.** Alignment of predicted amino acid sequences for chorismate synthase in different species of plants. The parts marked in the square frame are the three conserved areas of chorismate synthase.
