# Supplementary material for: Cscs encoding chorismate synthase is a candidate gene for leaf variegation mutation in cucumber
Source: PubMed Central journal article supplement — Breed Sci. 2018 Nov 17;68(5):571–81. doi: 10.1270/jsbbs.18023 (PMC6345225; doi:10.1270/jsbbs.18023), 2018-11-17
Supplement: 68_18023_2.pdf [file 68_18023_2.pdf]

**Supplemental Table 1.** Primers used in this study

| Gene ID                         | Forward primer (5'-3')    | Reverse primer (5'-3')        |
|---------------------------------|---------------------------|-------------------------------|
| <i>Csa2G070310</i>              | CGATGCGGCCAAGAACCAAG      | TCTCCTGGTCCGGCAATCAC          |
| <i>Csa3G180260</i>              | CGCCATCGCCCTTAGAGGTT      | CTCTGACGGCCTGAAAGCCT          |
| <i>Csa7G312930</i>              | TTGTAACGAACGCCGAGGGA      | TTCGCCAACTGGCCAACAAG          |
| <i>Csa3G020080</i>              | ACGATGACGACCGCTCTGTT      | TTCAGCACCTGGCTTAGGCT          |
| <i>Csa3G183950</i>              | AACCATCGCAAGGTCGGGTA      | TCTCGGCCACAAGGTAAGCC          |
| <i>Csa1G597730</i>              | TCTGTGCTGCTCAATTCGC       | TTTCGGAAACCAGCGAGGGA          |
| <i>Csa7G072770</i>              | ACAGAGTCCACTAAGCGTACCG    | CGTTTCTTTCCAGTCTGCTCGTG       |
| <i>Csa5G514500</i>              | CGTTGTCAACGTTTCCTGCTT     | TGCAGCTGTAGGCTCGTTGA          |
| <i>Csa6G519700</i>              | GGAAGCAGAGAAGGTCTTGA      | GAGCTGGAGATTAAGCCACT          |
| <i>Csa6G513610</i>              | TAACCGCCTCTGTCCTTGCC      | GCAGAGCCGACGACACTTTG          |
| <i>Csa5G174570</i>              | GGCCGCAGGATGATGAGTTG      | ATTGCCTCCGCCATATCCGT          |
| <i>Csa1G589710</i>              | GCCACACAGAACGCAACCAA      | CCGATGCAAACGTCGGTGAA          |
| <i>Csa1G527870</i>              | TCCGGAAATCGCTCGAGAAAC     | ACCGTCTTCGACCTCCACTT          |
| <i>Csa5G515060</i>              | CGAAGAGGCAACAATCATGG      | GCTCTTCACAAGGTGGATCT          |
| <i>Csa4G296260</i>              | GGTGGAGGGAAGCAGTGGAG      | GCATTAACAACGCCGTCGGA          |
| <i>Csa3G207390</i>              | CCTCGTCCTCCCAGCTTTCC      | GATCTCCGCGGCCCATTTTC          |
| <i>Csa3G073840</i>              | TCGCGTTCTCGAGTCCTTCC      | GAAGCTCTCAGCGCAATCCC          |
| <i>Csa3G625630</i>              | GAAACAAGGCCGTCTCAGTG      | CAGCAAATCAGCTGACCGTT          |
| <i>Csa6G405290</i>              | CTGCTGGAGCTGTTGCTAAG      | CTCACACGAACAGCGTCAAT          |
| <i>CsEF1a</i>                   | CCTTGGTGTCAAGCAGATGA      | TGAAGACACCTCCTTGATGATTT       |
| SNP- 18277305<br>Primer AlleleX | AATTTCAAAGCCCTTCGATGCTGG  | ACAAACTTGAAGCTGAGTTTGCTAAAGCT |
| SNP- 18277305<br>Primer AlleleY | CAATTTCAAAGCCCTTCGATGCTGA | ACAAACTTGAAGCTGAGTTTGCTAAAGCT |
| SNP- 23376757<br>Primer AlleleX | TTCATGATGCTGCATCAGTCCC    | CTCACTTGATACATTGGAAGAGCTAACTT |
| SNP- 23376757<br>Primer AlleleY | CTTCATGATGCTGCATCAGTCCT   | CTCACTTGATACATTGGAAGAGCTAACTT |

**Supplemental Table 2.** Photosynthetic parameters of wild type and *Csvl* mutant leaves

| Material           | Photosynthetic rate<br>( $\mu\text{mol CO}_2 \text{ m}^{-2} \text{ s}^{-2}$ ) | Stomatal conductance<br>( $\text{mol H}_2\text{O}_2 \text{ m}^{-2} \text{ s}^{-2}$ ) | Intercellular CO <sub>2</sub><br>concentration<br>( $\mu\text{mol CO}_2 \text{ mol}^{-1}$ ) | Transpiration rate<br>( $\text{mmol H}_2\text{O}_2 \text{ m}^{-2} \text{ s}^{-2}$ ) |
|--------------------|-------------------------------------------------------------------------------|--------------------------------------------------------------------------------------|---------------------------------------------------------------------------------------------|-------------------------------------------------------------------------------------|
| Wild type          | 7.0871 $\pm$ 2.55                                                             | 0.31 $\pm$ 0.10                                                                      | 313.43 $\pm$ 25.72                                                                          | 6.05 $\pm$ 1.60                                                                     |
| <i>Csvl</i> mutant | 2.90 $\pm$ 1.30 *                                                             | 0.59 $\pm$ 0.14 *                                                                    | 354.50 $\pm$ 6.35 *                                                                         | 8.40 $\pm$ 1.50 *                                                                   |

A total of 10 wild type and mutant plants were assayed, respectively. ‘\*’ indicate the significant difference of target between wild type and *Csvl* mutant with  $p$  value  $< 0.05$ . Datas were presented as means  $\pm$  SD of five replicates.  $t$  test was conducted for statistical analysis.

[illegible]

[illegible]

[illegible]

|            |   |   |    |    |   |       |           |                      |          |
|------------|---|---|----|----|---|-------|-----------|----------------------|----------|
| Chi1707376 | T | G | 10 | 11 | 2 | 8.862 | integrate | CuSfGR120C/CuSfGR120 | 11957634 |
| Chi1707374 | C | T | 10 | 10 | 2 | 8.833 | integrate | CuSfGR120C/CuSfGR120 | 12077626 |
| Chi1707373 | A | A | 10 | 12 | 0 | 8.8   | integrate | CuSfGR120C/CuSfGR120 | 12767927 |
| Chi1707378 | G | C | 10 | 12 | 3 | 8.8   | integrate | CuSfGR120C/CuSfGR120 | 12917642 |
| Chi1707372 | T | T | 10 | 9  | 0 | 8.75  | integrate | CuSfGR120C/CuSfGR120 | 13267113 |
| Chi1707393 | C | G | 10 | 13 | 5 | 8.722 | integrate | CuSfGR120C/CuSfGR120 | 14217688 |
| Chi1708009 | T | T | 10 | 13 | 0 | 8.722 | integrate | CuSfGR120C/CuSfGR120 | 15257110 |
| Chi1708004 | G | T | 10 | 8  | 3 | 8.721 | integrate | CuSfGR120C/CuSfGR120 | 17777526 |
| Chi1708013 | T | T | 10 | 10 | 0 | 8.706 | integrate | CuSfGR120C/CuSfGR120 | 18267207 |
| Chi1708029 | C | T | 10 | 10 | 3 | 8.700 | integrate | CuSfGR120C/CuSfGR120 | 17527361 |
| Chi1708076 | G | T | 10 | 11 | 0 | 8.647 | integrate | CuSfGR120C/CuSfGR120 | 18687664 |
| Chi1708046 | A | C | 10 | 8  | 5 | 8.614 | integrate | CuSfGR120C/CuSfGR120 | 19297604 |
| Chi1708047 | T | T | 10 | 11 | 0 | 8.605 | integrate | CuSfGR120C/CuSfGR120 | 19687493 |
| Chi1708047 | A | C | 10 | 10 | 4 | 8.743 | integrate | CuSfGR120C/CuSfGR120 | 19807673 |
| Chi1708046 | C | T | 10 | 11 | 0 | 8.684 | integrate | CuSfGR120C/CuSfGR120 | 19987454 |
| Chi1708044 | C | T | 10 | 11 | 5 | 8.671 | integrate | CuSfGR120C/CuSfGR120 | 20377706 |
| Chi1708048 | A | A | 10 | 13 | 0 | 8.666 | integrate | CuSfGR120C/CuSfGR120 | 20717704 |
| Chi1708041 | G | C | 10 | 10 | 5 | 8.667 | integrate | CuSfGR120C/CuSfGR120 | 21747609 |
| Chi1708062 | C | C | 10 | 9  | 0 | 8.625 | integrate | CuSfGR120C/CuSfGR120 | 22717608 |
| Chi1708090 | A | T | 10 | 9  | 4 | 8.602 | integrate | CuSfGR120C/CuSfGR120 | 22867647 |
| Chi1708083 | C | C | 10 | 9  | 0 | 8.7   | integrate | CuSfGR120C/CuSfGR120 | 22967637 |
| Chi1708084 | C | T | 10 | 9  | 3 | 8.7   | integrate | CuSfGR120C/CuSfGR120 | 23977636 |
| Chi1708062 | C | G | 10 | 9  | 0 | 8.602 | integrate | CuSfGR120C/CuSfGR120 | 24187614 |
| Chi1708036 | C | T | 10 | 9  | 0 | 8.7   | integrate | CuSfGR120C/CuSfGR120 | 24297604 |
| Chi1708080 | G | C | 10 | 9  | 0 | 8.614 | integrate | CuSfGR120C/CuSfGR120 | 24717680 |
| Chi1708047 | G | A | 10 | 6  | 5 | 8.545 | integrate | CuSfGR120C/CuSfGR120 | 25977638 |
| Chi1708043 | G | A | 10 | 6  | 0 | 8.545 | integrate | CuSfGR120C/CuSfGR120 | 27967677 |
| Chi1708045 | G | A | 10 | 7  | 5 | 8.553 | integrate | CuSfGR120C/CuSfGR120 | 28987647 |
| Chi1708026 | T | T | 10 | 8  | 0 | 8.772 | integrate | CuSfGR120C/CuSfGR120 | 31157614 |
| Chi1708046 | G | A | 10 | 6  | 5 | 8.545 | integrate | CuSfGR120C/CuSfGR120 | 48017672 |
| Chi1708046 | G | A | 10 | 6  | 0 | 8.623 | integrate | CuSfGR120C/CuSfGR120 | 52447669 |
| Chi1708062 | C | G | 10 | 14 | 4 | 8.778 | integrate | CuSfGR120C/CuSfGR120 | 62217625 |
| Chi1708062 | C | G | 10 | 12 | 4 | 8.778 | integrate | CuSfGR120C/CuSfGR120 | 6767647  |
| Chi1708061 | G | A | 10 | 12 | 4 | 8.7   | integrate | CuSfGR120C/CuSfGR120 | 67847622 |
| Chi1708064 | G | T | 10 | 11 | 0 | 8.583 | integrate | CuSfGR120C/CuSfGR120 | 68617672 |
| Chi1708064 | A | G | 10 | 14 | 4 | 8.747 | integrate | CuSfGR120C/CuSfGR120 | 68247604 |
| Chi1708065 | G | T | 10 | 14 | 0 | 8.7   | integrate | CuSfGR120C/CuSfGR120 | 64427706 |
| Chi1708062 | A | G | 10 | 15 | 7 | 8.667 | integrate | CuSfGR120C/CuSfGR120 | 64017678 |
| Chi1708064 | T | T | 10 | 15 | 0 | 8.667 | integrate | CuSfGR120C/CuSfGR120 | 64987674 |
| Chi1708065 | A | G | 10 | 15 | 9 | 8.625 | integrate | CuSfGR120C/CuSfGR120 | 64147619 |
| Chi1708065 | A | G | 10 | 15 | 9 | 8.625 | integrate | CuSfGR120C/CuSfGR120 | 61717618 |
| Chi1708065 | G | A | 10 | 15 | 9 | 8.625 | integrate | CuSfGR120C/CuSfGR120 | 61817611 |
| Chi17080   |   |   |    |    |   |       |           |                      |          |

|          |   |   |    |    |   |       |           |                  |          |                |                                        |
|----------|---|---|----|----|---|-------|-----------|------------------|----------|----------------|----------------------------------------|
| Cu174584 | G | A | 0  | 8  | 0 | 0.386 | integrasi | Cu168776Cu168780 | 689,2512 |                |                                        |
| Cu174589 | G | A | 10 | 9  | 0 | 0.437 | integrasi | Cu168776Cu168780 | 689,2416 |                |                                        |
| Cu174592 | G | A | 10 | 11 | 0 | 0.477 | integrasi | Cu168776Cu168780 | 689,2414 |                |                                        |
| Cu174594 | T | C | 10 | 13 | 8 | 0.439 | integrasi | Cu168776Cu168780 | 709,2331 |                |                                        |
| Cu174597 | G | A | 0  | 0  | 0 | 0.773 | integrasi | Cu168776Cu168780 | 709,2331 |                |                                        |
| Cu174598 | A | C | 10 | 8  | 0 | 0.80  | integrasi | Cu168776Cu168780 | 723,2130 |                |                                        |
| Cu174599 | G | A | 0  | 0  | 0 | 0.8   | integrasi | Cu168776Cu168780 | 739,176  |                |                                        |
| Cu174611 | C | G | 0  | 0  | 0 | 0.781 | integrasi | Cu168776Cu168780 | 773,1871 |                |                                        |
| Cu174614 | G | A | 0  | 0  | 0 | 0.82  | integrasi | Cu168776Cu168780 | 779,1622 |                |                                        |
| Cu174615 | G | A | 0  | 0  | 3 | 0.7   | integrasi | Cu168776Cu168780 | 783,1571 |                |                                        |
| Cu174616 | A | C | 0  | 0  | 0 | 0.714 | integrasi | Cu168776Cu168780 | 790,1462 |                |                                        |
| Cu174647 | T | C | 0  | 0  | 9 | 0.011 | axioma    | Cu168780         |          | synonymous_NSV | Cu168776Cu168780 1 exon 1 (ASG) p.R219 |
| Cu174691 | T | C | 0  | 0  | 0 | 0.4   | axioma    | Cu168780         |          |                |                                        |
| Cu174692 | G | A | 0  | 0  | 0 | 0.6   | integrasi | Cu168780         |          |                |                                        |
| Cu174693 | G | A | 0  | 0  | 0 | 0.617 | integrasi | Cu168780         |          |                |                                        |
| Cu174694 | G | T | 0  | 0  | 0 | 0.284 | axioma    | Cu168780         |          |                |                                        |
| Cu174698 | G | T | 0  | 0  | 0 | 0.425 | axioma    | Cu168780         |          |                |                                        |
| Cu174699 | G | T | 0  | 0  | 0 | 0.8   | axioma    | Cu168780         |          |                |                                        |
| Cu174700 | G | T | 0  | 0  | 0 | 0.667 | axioma    | Cu168780         |          |                |                                        |
| Cu174722 | T | C | 10 | 17 | 3 | 0.6   | axioma    | Cu168780         |          |                |                                        |
| Cu174723 | T | C | 10 | 18 | 0 | 0.667 | axioma    | Cu168780         |          |                |                                        |
| Cu174751 | G | A | 10 | 12 | 0 | 0.636 | axioma    | Cu168780         |          |                |                                        |
| Cu174879 | T | G | 0  | 0  | 5 | 0.784 | axioma    | Cu168780         |          |                |                                        |
| Cu174885 | T | G | 0  | 0  | 5 | 0.722 | axioma    | Cu168780         |          |                |                                        |
| Cu174890 | T | G | 0  | 0  | 0 | 0.636 | axioma    | Cu168780         |          |                |                                        |
| Cu174911 | C | G | 0  | 0  | 0 | 0.687 | axioma    | Cu168780         |          |                |                                        |
| Cu174913 | C | G | 10 | 11 | 0 | 0.739 | axioma    | Cu168780         |          |                |                                        |
| Cu174914 | A | T | 0  | 0  | 0 | 0.5   | axioma    | Cu168780         |          |                |                                        |
| Cu174922 | A | T | 0  | 0  | 0 | 0.475 | integrasi | Cu168776Cu168780 | 388,2514 |                |                                        |
| Cu174958 | A | C | 0  | 0  | 5 | 0.503 | integrasi | Cu168776Cu168780 | 391,2452 |                |                                        |
| Cu174971 | T | C | 0  | 0  | 0 | 0.533 | integrasi | Cu168776Cu168780 | 397,2459 |                |                                        |
| Cu174984 | G | A | 0  | 0  | 0 | 0.8   | integrasi | Cu168776Cu168780 | 524,2380 |                |                                        |
| Cu174985 | G | A | 0  | 0  | 0 | 0.75  | integrasi | Cu168776Cu168780 | 545,2276 |                |                                        |
| Cu174996 | T | C | 0  | 0  | 0 | 0.743 | integrasi | Cu168776Cu168780 | 571,2270 |                |                                        |
| Cu174997 | T | C | 0  | 0  | 0 | 0.727 | integrasi | Cu168776Cu168780 | 574,2214 |                |                                        |
| Cu175002 | G | T | 10 | 11 | 4 | 0.733 | integrasi | Cu168776Cu168780 | 475,2314 |                |                                        |
| Cu175006 | G | T | 0  | 0  | 0 | 0.733 | integrasi | Cu168776Cu168780 | 475,2314 |                |                                        |
| Cu175009 | C | A | 0  | 0  | 0 | 0.75  | integrasi | Cu168776Cu168780 | 482,2349 |                |                                        |
| Cu175049 | C | A | 0  | 0  | 0 | 0.386 | integrasi | Cu168776Cu168780 | 479,2121 |                |                                        |
| Cu175055 | C | A | 0  | 0  | 0 | 0.739 | integrasi | Cu168776Cu168780 | 484,2349 |                |                                        |
| Cu175056 | C | A | 0  | 0  | 0 | 0.739 | integrasi | Cu168776Cu168780 | 484,2349 |                |                                        |
| Cu175057 | C | A | 0  | 0  | 0 | 0.739 | integrasi | Cu168776Cu168780 | 484,2349 |                |                                        |
| Cu175058 | C | A | 0  | 0  | 0 | 0.739 | integrasi | Cu168776Cu168780 |          |                |                                        |

|     |         |   |   |    |    |    |       |          |                   |            |                |                                           |
|-----|---------|---|---|----|----|----|-------|----------|-------------------|------------|----------------|-------------------------------------------|
| Cu1 | 1718199 | T | C | 11 | 12 | 4  | 0.75  | exact    | Cu1GPR20          | -          | noentrymsa_SVV | Cu1GPR20 Cu1M0R20 1 exact c A1M0 p N232   |
| Cu1 | 1718221 | G | T | 11 | 12 | 5  | 0.789 | noentry  | Cu1GPR20          | -          | -              | -                                         |
| Cu1 | 1718177 | T | G | 11 | 11 | 7  | 0.611 | noentry  | Cu1GPR20          | -          | -              | -                                         |
| Cu1 | 1718186 | G | T | 11 | 11 | 9  | 0.475 | noentry  | Cu1GPR20          | -          | -              | -                                         |
| Cu1 | 1718149 | G | A | 11 | 6  | 12 | 0.133 | exact    | Cu1GPR20          | -          | noentrymsa_SVV | Cu1GPR20 Cu1M0R20 1 exact c T2B1 p L429   |
| Cu1 | 1720847 | G | C | 11 | 8  | 9  | 0.429 | noentry  | Cu1GPR20          | -          | -              | -                                         |
| Cu1 | 1720845 | T | C | 11 | 12 | 8  | 0.6   | exact    | Cu1GPR20          | -          | -              | -                                         |
| Cu1 | 1720829 | G | C | 11 | 11 | 11 | 0.411 | noentry  | Cu1GPR20          | -          | -              | -                                         |
| Cu1 | 1720808 | C | G | 11 | 7  | 10 | 0.618 | noentry  | Cu1GPR20          | -          | -              | -                                         |
| Cu1 | 1720819 | T | G | 11 | 12 | 11 | 0.174 | noentry  | Cu1GPR20          | -          | -              | -                                         |
| Cu1 | 1720843 | A | G | 11 | 10 | 7  | 0.682 | noentry  | Cu1GPR20          | -          | -              | -                                         |
| Cu1 | 1720879 | G | A | 11 | 11 | 9  | 0.747 | noentry  | Cu1GPR20          | -          | -              | -                                         |
| Cu1 | 1721141 | T | C | 11 | 8  | 5  | 0.034 | exact    | Cu1GPR20          | -          | spynmsa_SVV    | Cu1GPR20 Cu1M0R20 1 exact c T314C p C17C  |
| Cu1 | 1721247 | G | A | 11 | 7  | 5  | 0.683 | spynms   | Cu1GPR20          | -          | -              | -                                         |
| Cu1 | 1721227 | C | G | 11 | 8  | 9  | 0.773 | spynms   | Cu1GPR20          | -          | -              | -                                         |
| Cu1 | 1721245 | T | G | 11 | 8  | 8  | 0.687 | spynms   | Cu1GPR20          | -          | -              | -                                         |
| Cu1 | 1721236 | A | C | 11 | 11 | 6  | 0.475 | spynms   | Cu1GPR20          | -          | -              | -                                         |
| Cu1 | 1721232 | G | C | 11 | 11 | 6  | 0.682 | spynms   | Cu1GPR20          | -          | -              | -                                         |
| Cu1 | 1721231 | T | C | 11 | 9  | 3  | 0.75  | spynms   | Cu1GPR20          | -          | -              | -                                         |
| Cu1 | 1721217 | T | C | 11 | 10 | 11 | 0.611 | spynms   | Cu1GPR20          | -          | -              | -                                         |
| Cu1 | 1721213 | C | G | 11 | 10 | 10 | 0.477 | spynms   | Cu1GPR20 Cu1GPR20 | 1182.2139  | -              | -                                         |
| Cu1 | 1721211 | A | C | 11 | 7  | 5  | 0.683 | spynms   | Cu1GPR20 Cu1GPR20 | 1172.213   | -              | -                                         |
| Cu1 | 1721209 | T | C | 11 | 8  | 9  | 0.683 | spynms   | Cu1GPR20 Cu1GPR20 | 1420.1575  | -              | -                                         |
| Cu1 | 1721241 | A | T | 11 | 7  | 6  | 0.585 | spynms   | Cu1GPR20 Cu1GPR20 | 1480.165   | -              | -                                         |
| Cu1 | 1721229 | T | C | 11 | 8  | 6  | 0.174 | spynms   | Cu1GPR20 Cu1GPR20 | 1529.1747  | -              | -                                         |
| Cu1 | 1721234 | G | C | 11 | 11 | 6  | 0.477 | spynms   | Cu1GPR20 Cu1GPR20 | 1613.1642  | -              | -                                         |
| Cu1 | 1721221 | G | A | 11 | 12 | 11 | 0.167 | spynms   | Cu1GPR20 Cu1GPR20 | 1720.1775  | -              | -                                         |
| Cu1 | 1721213 | C | C | 11 | 10 | 10 | 0.165 | spynms   | Cu1GPR20 Cu1GPR20 | 1802.165   | -              | -                                         |
| Cu1 | 1721201 | C | A | 11 | 10 | 10 | 0.6   | spynms   | Cu1GPR20 Cu1GPR20 | 1902.1643  | -              | -                                         |
| Cu1 | 1721246 | T | A | 11 | 8  | 16 | 0.749 | spynms   | Cu1GPR20 Cu1GPR20 | 2195.1100  | -              | -                                         |
| Cu1 | 1721228 | A | C | 11 | 11 | 5  | 0.75  | spynms   | Cu1GPR20 Cu1GPR20 | 2277.1668  | -              | -                                         |
| Cu1 | 1721244 | C | T | 11 | 16 | 6  | 0.777 | spynms   | Cu1GPR20 Cu1GPR20 | 2241.1612  | -              | -                                         |
| Cu1 | 1721211 | G | T | 11 | 9  | 2  | 0.682 | diversum | Cu1GPR20          | -          | -              | -                                         |
| Cu1 | 1721495 | C | G | 11 | 11 | 2  | 0.682 | diversum | Cu1GPR20          | -          | -              | -                                         |
| Cu1 | 1721486 | C | G | 11 | 11 | 2  | 0.682 | diversum | Cu1GPR20          | -          | -              | -                                         |
| Cu1 | 1721487 | T | A | 11 | 10 | 2  | 0.613 | diversum | Cu1GPR20          | -          | -              | -                                         |
| Cu1 | 1721489 | C | T | 11 | 11 | 9  | 0.682 | diversum | Cu1GPR20          | -          | -              | -                                         |
| Cu1 | 1721149 | C | A | 11 | 9  | 3  | 0.75  | diversum | Cu1GPR20          | -          | -              | -                                         |
| Cu1 | 1721131 | T | C | 11 | 11 | 9  | 0.773 | diversum | Cu1GPR20          | -          | -              | -                                         |
| Cu1 | 1721148 | C | T | 11 | 10 | 3  | 0.762 | diversum | Cu1GPR20          | -          | -              | -                                         |
| Cu1 | 1721151 | A | C | 11 | 10 | 3  | 0.767 | diversum | Cu1GPR20          | -          | -              | -                                         |
| Cu1 | 1721172 | T | C | 11 | 10 | 3  | 0.762 | diversum | Cu1GPR20          | -          | -              | -                                         |
| Cu1 | 1721139 | A | T | 11 | 12 | 2  | 0.616 | diversum | Cu1GPR20          | -          | -              | -                                         |
| Cu1 | 1721153 | C | T | 11 | 8  | 6  | 0.174 | exact    | Cu1GPR20          | -          | -              | -                                         |
| Cu1 | 1721181 | C | T | 11 | 9  | 6  | 0.477 | exact    | Cu1GPR20          | -          | -              | -                                         |
| Cu1 | 1721144 | G | A | 11 | 11 | 6  | 0.585 | exact    | Cu1GPR20          | -          | -              | -                                         |
| Cu1 | 1721136 | T | C | 11 | 8  | 7  | 0.769 | exact    | Cu1GPR20          | -          | spynmsa_SVV    | Cu1GPR20 Cu1M0R20 1 exact c G3B7A p Y1071 |
| Cu1 | 1721241 | T | G | 11 | 8  | 3  | 0.773 | noentry  | Cu1GPR20          | -          | -              | -                                         |
| Cu1 | 1721216 | C | A | 11 | 8  | 3  | 0.613 | noentry  | Cu1GPR20          | -          | -              | -                                         |
| Cu1 | 1721218 | C | T | 11 | 14 | 14 | 0.475 | noentry  | Cu1GPR20          | -          | -              | -                                         |
| Cu1 | 1721211 | A | G | 11 | 11 | 1  | 0.475 | noentry  | Cu1GPR20          | -          | -              | -                                         |
| Cu1 | 1718181 | T | C | 11 | 9  | 4  | 0.454 | spynms   | Cu1GPR20          | -          | -              | -                                         |
| Cu1 | 1718127 | A | T | 11 | 10 | 1  | 0.981 | spynms   | Cu1GPR20 Cu1GPR20 | 361.12748  | -              | -                                         |
| Cu1 | 1718126 | G | T | 11 | 11 | 1  | 0.981 | spynms   | Cu1GPR20 Cu1GPR20 | 361.12761  | -              | -                                         |
| Cu1 | 1718112 | C | T | 11 | 6  | 3  | 0.75  | spynms   | Cu1GPR20 Cu1GPR20 | 373.1261   | -              | -                                         |
| Cu1 | 1718114 | G | A | 11 | 8  | 12 | 0.687 | spynms   | Cu1GPR20 Cu1GPR20 | 381.12171  | -              | -                                         |
| Cu1 | 1718117 | G | A | 11 | 8  | 12 | 0.684 | spynms   | Cu1GPR20 Cu1GPR20 | 392.12466  | -              | -                                         |
| Cu1 | 1718115 | T | C | 11 | 11 | 8  | 0.684 | spynms   | Cu1GPR20 Cu1GPR20 | 2018.12389 | -              | -                                         |
| Cu1 | 1718135 | G | A | 11 | 8  | 8  | 0.687 | spynms   | Cu1GPR20 Cu1GPR20 | 2061.1218  | -              | -                                         |
| Cu1 | 1718141 | T | C | 11 | 11 | 8  | 0.687 | spynms   | Cu1GPR20 Cu1GPR20 | 2118.12148 | -              | -                                         |
| Cu1 | 1718199 | C | T | 11 | 8  | 8  | 0.5   | spynms   | Cu1GPR20 Cu1GPR20 | 2191.1233  | -              | -                                         |
| Cu1 | 1718129 | T | C | 11 | 8  | 8  | 0.687 | spynms   | Cu1GPR20 Cu1GPR20 | 2214.12164 | -              | -                                         |
| Cu1 | 1718422 | A | A | 11 | 7  | 6  | 0.585 | spynms   | Cu1GPR20 Cu1GPR20 | 2673.1271  | -              | -                                         |
| Cu1 | 1718486 | G | A | 11 | 11 | 6  | 0.68  | spynms   | Cu1GPR20 Cu1GPR20 | 2861.13133 | -              | -                                         |
| Cu1 | 1718417 | T | C | 11 | 6  | 6  | 0.5   | spynms   | Cu1GPR20 Cu1GPR20 | 3113.1236  | -              | -                                         |
| Cu1 | 1718419 | C | T | 11 | 11 | 6  | 0.585 | spynms   | Cu1GPR20 Cu1GPR20 | 3113.1233  | -              | -                                         |
| Cu1 | 1718415 | G | A | 11 | 7  | 8  | 0.687 | spynms   | Cu1GPR20 Cu1GPR20 | 3113.1233  | -              | -                                         |
| Cu1 | 1718411 | T | C | 11 | 11 | 8  | 0.5   | spynms   | Cu1GPR20 Cu1GPR20 | 3113.1236  | -              | -                                         |
| Cu1 | 1718414 | G | A | 11 | 14 | 5  | 0.768 | spynms   | Cu1GPR20 Cu1GPR20 | 3271.12119 | -              | -                                         |
| Cu1 | 1718419 | G | A | 11 | 14 | 5  | 0.768 | spynms   | Cu1GPR20 Cu1GPR20 | 3271.12119 | -              | -                                         |
| Cu1 | 1718411 | C | T | 11 | 11 | 6  | 0.475 | spynms   | Cu1GPR20 Cu1GPR20 | 3321.12172 | -              | -                                         |
| Cu1 | 1718411 | T | C | 11 | 11 | 6  | 0.174 | spynms   | Cu1GPR20 Cu1GPR20 | 3318.12062 | -              | -                                         |
| Cu1 | 1718419 | G | A | 11 | 7  | 7  | 0.5   | spynms   | Cu1GPR20 Cu1GPR20 | 3341.124   | -              | -                                         |
| Cu1 | 1718411 | C | C | 11 | 11 | 6  | 0.687 | spynms   | Cu1GPR20 Cu1GPR20 | 3318.1206  | -              | -                                         |
| Cu1 | 1718468 | A | G | 11 | 11 | 9  | 0.5   | spynms   | Cu1GPR20 Cu1GPR20 | 3313.1225  | -              | -                                         |
| Cu1 | 1718466 | G | T | 11 | 11 | 6  | 0.64  | spynms   | Cu1GPR20 Cu1GPR20 | 3317.12677 | -              | -                                         |
| Cu1 | 1718118 | T | C | 11 | 12 | 13 | 0.517 | spynms   | Cu1GPR20 Cu1GPR20 | 3713.13685 | -              | -                                         |
| Cu1 | 1718113 | A | T | 11 | 11 | 13 | 0.426 | spynms   | Cu1GPR20 Cu1GPR20 | 3718.13669 | -              | -                                         |
| Cu1 | 1718114 | C | A | 11 | 16 | 9  | 0.64  | spynms   | Cu1GPR20 Cu1GPR20 | 3718.1369  | -              | -                                         |
| Cu1 | 1718117 | G | A | 11 | 8  | 13 | 0.611 | spynms   | Cu1GPR20 Cu1GPR20 | 3822.1379  | -              | -                                         |
| Cu1 | 1718139 | C | T | 11 | 8  | 15 | 0.769 | spynms   | Cu1GPR20 Cu1GPR20 | 3841.1374  | -              | -                                         |
| Cu1 | 1718149 | C | A | 11 | 8  | 15 | 0.622 | spynms   | Cu1GPR20 Cu1GPR20 | 3841.13694 | -              | -                                         |
| Cu1 | 1718128 | C | T | 11 | 10 | 14 | 0.581 | spynms   | Cu1GPR20 Cu1GPR20 | 3923.13675 | -              | -                                         |
| Cu1 | 1718126 | G | A | 11 | 12 | 4  | 0.75  | spynms   | Cu1GPR20 Cu1GPR20 | 3913.13685 | -              | -                                         |
| Cu1 | 1718119 | C | G | 11 | 8  | 8  | 0.5   | spynms   | Cu1GPR20 Cu1GPR20 | 4012.13646 | -              | -                                         |
| Cu1 | 1718146 | C | G | 11 | 8  | 8  | 0.5   | spynms   | Cu1GPR20 Cu1GPR20 | 4013.13647 | -              | -                                         |
| Cu1 | 1718123 | G | A | 11 | 10 | 11 | 0.769 | spynms   | Cu1GPR20 Cu1GPR20 | 4012.13646 | -              | -                                         |
| Cu1 | 1718126 | G | A | 11 | 10 | 11 | 0.5   | spynms   | Cu1GPR20 Cu1GPR20 | 4017.1797  | -              | -                                         |
| Cu1 | 1718127 | G | A | 11 | 10 | 11 | 0.476 | spynms   | Cu1GPR20 Cu1GPR20 | 4017.1797  | -              | -                                         |
| Cu1 | 1718126 | G | A | 11 | 8  | 11 | 0.769 | spynms   | Cu1GPR20 Cu1GPR20 | 4067.1777  | -              | -                                         |
| Cu1 | 1718147 | C | T | 11 | 7  | 6  | 0.585 | spynms   | Cu1GPR20 Cu1GPR20 | 4072.1606  | -              | -                                         |
| Cu1 | 1718148 | C | T | 11 | 7  | 6  | 0.585 | spynms   | Cu1GPR20 Cu1GPR20 | 4072.1606  | -              | -                                         |
| Cu1 | 1718139 | G | A | 11 | 7  | 6  | 0.675 | spynms   | Cu1GPR20 Cu1GPR20 | 4071.1605  | -              | -                                         |
| Cu1 | 1718121 | T | C | 11 | 11 | 4  | 0.585 | spynms   | Cu1GPR20 Cu1GPR20 | 4071.1605  | -              | -                                         |
| Cu1 | 1718127 | T | C | 11 | 7  | 4  | 0.584 | spynms   | Cu1GPR20 Cu1GPR20 | 5017.1611  | -              | -                                         |
| Cu1 | 1718179 | G | T | 11 | 8  | 5  | 0.585 | spynms   | Cu1GPR20 Cu1GPR20 | 5140.1614  | -              | -                                         |
| Cu1 | 1718181 | G | T | 11 | 8  | 5  | 0.585 | spynms   | Cu1GPR20 Cu1GPR20 | 5140.1614  | -              | -                                         |
| Cu1 | 1718163 | A | G | 11 | 6  | 7  | 0.613 | spynms   | Cu1GPR20 Cu1GPR20 | 5468.1609  | -              | -                                         |
| Cu1 | 1718171 | C | G | 11 | 11 | 3  | 0.513 | spynms   | Cu1GPR20 Cu1GPR20 | 5706.1602  | -              | -                                         |
| Cu1 | 1718163 | C | G | 11 | 6  | 7  | 0.513 | spynms   | Cu1GPR20 Cu1GPR20 | 5706.1609  | -              | -                                         |
| Cu1 | 1718173 | C | G | 11 | 8  | 6  | 0.174 | spynms   | Cu1GPR20 Cu1GPR20 | 5716.1620  | -              | -                                         |
| Cu1 | 1718176 | A | C | 11 | 8  | 6  | 0.174 | spynms   | Cu1GPR20 Cu1GPR20 | 5716.1620  | -              | -                                         |
| Cu1 | 1718176 | A | C | 11 | 8  | 6  | 0.687 | spynms   | Cu1GPR20 Cu1GPR20 | 6001.1617  | -              | -                                         |
| Cu1 | 1718179 | T | C | 11 | 8  | 11 | 0.687 | spynms   | Cu1GPR20 Cu1GPR20 | 6001.1617  | -              | -                                         |
| Cu1 | 1718199 | G | A | 11 | 9  | 12 | 0.61  | spynms   | Cu1GPR20 Cu1GPR20 | 6194.1614  | -              | -                                         |
| Cu1 | 1718195 | A | C | 11 | 9  | 6  | 0.6   | spynms   | Cu1GPR20 Cu1GPR20 | 6194.1614  | -              | -                                         |
| Cu1 | 1718195 | A | C | 11 | 11 | 6  | 0.5   | spynms   | Cu1GPR20 Cu1GPR20 | 6194.1614  | -              | -                                         |
| Cu1 | 1718194 | C | T | 11 | 12 | 4  | 0.733 | spynms   | Cu1GPR20 Cu1GPR20 | 6191.1679  | -              | -                                         |
| Cu1 | 1718194 | C | T | 11 | 12 | 4  | 0.6   | spynms   | Cu1GPR20 Cu1GPR20 | 6192.1679  | -              | -                                         |
| Cu1 | 1718194 | C | T | 11 | 11 | 6  | 0.514 | spynms   | Cu1GPR20 Cu1GPR20 | 6191.1679  | -              | -                                         |
| Cu1 | 1718191 | A | T | 11 | 11 | 1  | 0.767 | spynms   | Cu1GPR20 Cu1GPR20 | 6421.1603  | -              | -                                         |
| Cu1 | 1718183 | A | C | 11 | 10 | 1  | 0.743 | spynms   | Cu1GPR20 Cu1GPR20 | 6420.1670  | -              | -                                         |
| Cu1 | 1718183 | A | C | 11 | 11 | 1  | 0.743 | spynms   | Cu1GPR20 Cu1GPR20 | 6420.1670  | -              | -                                         |
| Cu1 | 1718183 | A | C | 11 | 10 | 1  | 0.743 | spynms   | Cu1GPR20 Cu1GPR20 | 6420.1670  | -              | -                                         |
| Cu1 | 1718127 |   |   |    |    |    |       |          |                   |            |                |                                           |

[illegible]

|     |          |   |   |    |    |    |        |        |                      |           |
|-----|----------|---|---|----|----|----|--------|--------|----------------------|-----------|
| ChI | 18742041 | A | G | 00 | 5  | 10 | 0.6667 | merged | CuIcG12218CuIcG12228 | 1987.3074 |
| ChI | 18742017 | C | T | 00 | 5  | 10 | 0.6667 | merged | CuIcG12218CuIcG12228 | 1993.3662 |
| ChI | 18742081 | A | G | 00 | 5  | 10 | 0.6673 | merged | CuIcG12218CuIcG12228 | 1993.3606 |
| ChI | 18742194 | T | C | 00 | 6  | 9  | 0.6    | merged | CuIcG12218CuIcG12228 | 1998.2941 |
| ChI | 18742114 | C | T | 00 | 6  | 9  | 0.623  | merged | CuIcG12218CuIcG12228 | 1998.2917 |
| ChI | 18742228 | A | G | 00 | 6  | 10 | 0.625  | merged | CuIcG12218CuIcG12228 | 1997.2964 |
| ChI | 18742211 | C | T | 00 | 6  | 10 | 0.6    | merged | CuIcG12218CuIcG12228 | 1997.2964 |
| ChI | 18742277 | T | A | 00 | 6  | 9  | 0.7114 | merged | CuIcG12218CuIcG12228 | 1923.2038 |
| ChI | 18742486 | G | T | 00 | 8  | 9  | 0.6    | merged | CuIcG12218CuIcG12228 | 1923.2031 |
| ChI | 18742508 | G | T | 00 | 8  | 10 | 0.5516 | merged | CuIcG12218CuIcG12228 | 1934.2071 |
| ChI | 18742544 | C | T | 00 | 7  | 10 | 0.6447 | merged | CuIcG12218CuIcG12228 | 1940.2077 |
| ChI | 18742603 | G | T | 00 | 8  | 6  | 0.4286 | merged | CuIcG12218CuIcG12228 | 1949.2102 |
| ChI | 18742606 | G | T | 00 | 8  | 6  | 0.4286 | merged | CuIcG12218CuIcG12228 | 1949.2109 |
| ChI | 18742674 | T | C | 00 | 8  | 11 | 0.6522 | merged | CuIcG12218CuIcG12228 | 1935.2043 |
| ChI | 18742676 | T | C | 00 | 8  | 11 | 0.6522 | merged | CuIcG12218CuIcG12228 | 1935.2043 |
| ChI | 18742684 | A | G | 00 | 8  | 14 | 0.6384 | merged | CuIcG12218CuIcG12228 | 1935.2043 |
| ChI | 18742977 | G | A | 00 | 10 | 8  | 0.4444 | merged | CuIcG12218CuIcG12228 | 1923.2118 |
| ChI | 18742979 | G | A | 00 | 11 | 8  | 0.4211 | merged | CuIcG12218CuIcG12228 | 1923.2116 |
| ChI | 18743038 | C | T | 00 | 11 | 8  | 0.4211 | merged | CuIcG12218CuIcG12228 | 1998.2907 |
| ChI | 18743999 | A | G | 00 | 13 | 10 | 0.4548 | merged | CuIcG12218CuIcG12228 | 1949.2036 |
| ChI | 18743116 | C | T | 00 | 11 | 8  | 0.4752 | merged | CuIcG12218CuIcG12228 | 1998.2923 |
| ChI | 18743117 | T | C | 00 | 11 | 9  | 0.45   | merged | CuIcG12218CuIcG12228 | 1998.2918 |
| ChI | 18743176 | C | T | 00 | 11 | 8  | 0.45   | merged | CuIcG12218CuIcG12228 | 1998.2903 |
| ChI | 18743281 | C | T | 00 | 5  | 10 | 0.6667 | merged | CuIcG12218CuIcG12228 | 1723.1827 |
| ChI | 18743278 | C | T | 00 | 5  | 10 | 0.6667 | merged | CuIcG12218CuIcG12228 | 1723.1757 |
| ChI | 18743633 | T | C | 00 | 5  | 8  | 0.7273 | merged | CuIcG12218CuIcG12228 | 1704.1508 |
| ChI | 18743663 | A | G | 11 | 5  | 7  | 0.4167 | merged | CuIcG12218CuIcG12228 | 1704.1757 |
| ChI | 1877862  | T | G | 00 | 12 | 6  | 0.3333 | merged | CuIcG12218CuIcG12236 | 3794.2034 |
| ChI | 1880506  | C | G | 00 | 9  | 9  | 0.5771 | merged | CuIcG12238           |           |
| ChI | 1881464  | T | A | 00 | 9  | 6  | 0.5    | atomic | CuIcG12328           |           |
| ChI | 1882864  | G | A | 11 | 11 | 10 | 0.7905 | atomic | CuIcG12328           |           |
| ChI | 1883648  | T | C | 11 | 14 | 11 | 0.56   | merged | CuIcG12286CuIcG12236 | 1742.1343 |
| ChI | 1883679  | G | A | 00 | 12 | 11 | 0.5862 | merged | CuIcG12286CuIcG12279 | 217.2660  |
| ChI | 1884213  | G | T | 00 | 6  | 11 | 0.6862 | merged | CuIcG12286CuIcG12279 | 5676.2907 |
| ChI | 1885242  | A | T | 00 | 5  | 11 | 0.6273 | merged | CuIcG12286CuIcG12279 | 9962.2209 |
| ChI | 1889223  | G | A | 11 | 8  | 9  | 0.4796 | atomic | CuIcG12378           |           |
| ChI | 1889245  | A | T | 00 | 5  | 9  | 0.5245 | atomic | CuIcG12378           |           |
| ChI | 1890603  | A | G | 11 | 5  | 7  | 0.4167 | merged | CuIcG12378CuIcG12378 | 1568.3672 |
| ChI | 1897959  | G | A | 11 | 8  | 7  | 0.7143 | atomic | CuIcG12378           |           |
| ChI | 1898474  | C | T | 11 |    |    |        |        |                      |           |

[illegible]

|     |         |   |   |    |    |    |       |            |            |           |
|-----|---------|---|---|----|----|----|-------|------------|------------|-----------|
| CN1 | 1967152 | A | G | 00 | 11 | 8  | 0.381 | downstream | Cu61027590 | -         |
| CN1 | 1967156 | T | A | 00 | 9  | 8  | 0.386 | downstream | Cu61027590 | -         |
| CN1 | 1967162 | C | T | 00 | 12 | 7  | 0.384 | downstream | Cu61027590 | -         |
| CN1 | 1967164 | C | A | 00 | 9  | 8  | 0.387 | downstream | Cu61027590 | 117731476 |
| CN1 | 1967207 | G | T | 00 | 9  | 6  | 0.371 | downstream | Cu61027590 | 17781483  |
| CN1 | 1967211 | T | A | 00 | 9  | 6  | 0.454 | downstream | Cu61027590 | 17811487  |
| CN1 | 1967212 | G | A | 00 | 9  | 6  | 0.5   | downstream | Cu61027590 | 18911488  |
| CN1 | 1967216 | G | G | 00 | 9  | 6  | 0.585 | downstream | Cu61027590 | 18111482  |
| CN1 | 1967212 | C | T | 00 | 7  | 12 | 0.618 | downstream | Cu61027590 | 18811488  |
| CN1 | 1967226 | A | G | 00 | 9  | 11 | 0.418 | downstream | Cu61027590 | 18111482  |
| CN1 | 1967237 | A | G | 00 | 9  | 11 | 0.739 | downstream | Cu61027590 | 20911483  |
| CN1 | 1967236 | A | G | 00 | 9  | 11 | 0.616 | downstream | Cu61027590 | 20811484  |
| CN1 | 1967256 | T | C | 00 | 9  | 11 | 0.65  | downstream | Cu61027590 | 20911484  |
| CN1 | 1967311 | T | A | 00 | 9  | 11 | 0.722 | downstream | Cu61027590 | 21411487  |
| CN1 | 1967328 | T | C | 00 | 4  | 12 | 0.7   | downstream | Cu61027590 | 21411482  |
| CN1 | 1967329 | G | A | 00 | 4  | 11 | 0.75  | downstream | Cu61027590 | 21621481  |
| CN1 | 1967335 | A | G | 00 | 4  | 12 | 0.73  | downstream | Cu61027590 | 2161483   |
| CN1 | 1967366 | T | A | 00 | 4  | 11 | 0.733 | downstream | Cu61027590 | 21761474  |
| CN1 | 1967363 | T | A | 00 | 3  | 14 | 0.623 | downstream | Cu61027590 | 2231487   |
| CN1 | 1967172 | T | A | 00 | 11 | 12 | 0.8   | downstream | Cu61027590 | 23011488  |
| CN1 | 1967179 | A | G | 00 | 3  | 12 | 0.8   | downstream | Cu61027590 | 2321483   |
| CN1 | 1967186 | T | A | 00 | 3  | 12 | 0.75  | downstream | Cu61027590 | 23241424  |
| CN1 | 1967201 | G | A | 00 | 3  | 12 | 0.82  | downstream | Cu61027590 | 2341419   |
| CN1 | 1967188 | A | G | 00 | 7  | 8  | 0.825 | downstream | Cu61027590 | 24141212  |
| CN1 | 1967173 | T | G | 00 | 6  | 9  | 0.8   | downstream | Cu61027590 | 2361447   |
| CN1 | 1967219 | C | G | 00 | 11 | 7  | 0.389 | downstream | Cu61027590 | 23214101  |
| CN1 | 1967226 | A | G | 00 | 11 | 6  | 0.329 | downstream | Cu61027590 | 2391484   |
| CN1 | 1967227 | G | A | 00 | 11 | 6  | 0.329 | downstream | Cu61027590 | 2401485   |
| CN1 | 1967343 | A | T | 00 | 11 | 6  | 0.329 | downstream | Cu61027590 | 23761477  |
| CN1 | 1967396 | C | T | 00 | 10 | 10 | 0.5   | downstream | Cu61027590 | 24214839  |
| CN1 | 1967348 | C | T | 00 | 8  | 8  | 0.5   | downstream | Cu61027590 | 24111972  |
| CN1 | 1967361 | T | A | 00 | 10 | 10 | 0.5   | downstream | Cu61027590 | 23761488  |
| CN1 | 1967374 | T | A | 00 | 11 | 10 | 0.472 | downstream | Cu61027590 | 24711846  |
| CN1 | 1967385 | G | A | 00 | 10 | 12 | 0.527 | downstream | Cu61027590 | 23811835  |
| CN1 | 1967317 | G | T | 00 | 8  | 12 | 0.6   | downstream | Cu61027590 | 26711753  |
| CN1 | 1967361 | T | C | 00 | 8  | 10 | 0.6   | downstream | Cu61027590 | 26811759  |
| CN1 | 1967388 | T | C | 00 | 12 | 15 | 0.556 | downstream | Cu61027590 | 26211732  |
| CN1 | 1967311 | G | T | 00 | 9  | 16 | 0.574 | downstream | Cu61027590 | 26411709  |
| CN1 | 1967321 | C | T | 00 | 9  | 16 | 0.6   | downstream | Cu61027590 | 26411899  |
| CN1 | 1967346 | A | G | 00 | 16 | 10 | 0.366 | downstream | Cu61027590 | 30711574  |
| CN1 | 1967354 | G | A | 00 | 7  | 8  | 0.333 | downstream | Cu61027590 | 30811555  |
| CN1 | 1967376 | C | T | 00 | 16 | 8  | 0.333 | downstream | Cu61027590 | 31111342  |
| CN1 | 1967462 | G | A | 00 | 10 | 8  | 0.487 | downstream | Cu61027590 | 31811568  |
| CN1 | 1967424 | C | A | 00 | 11 | 10 | 0.472 | downstream | Cu61027590 | 32711596  |
| CN1 | 1967447 | T | A | 00 | 8  | 8  | 0.492 | downstream | Cu61027590 | 32811573  |
| CN1 | 1967436 | A | G | 00 | 8  | 5  | 0.386 | downstream | Cu61027590 | 32911584  |
| CN1 | 1967436 | G | A | 00 | 8  | 10 | 0.4   | downstream | Cu61027590 | 34211539  |
| CN1 | 1967429 | C | T | 00 | 4  | 15 | 0.785 | downstream | Cu61027590 | 34211591  |
| CN1 | 1967434 | C | A | 00 | 4  | 15 | 0.687 | downstream | Cu61027590 | 34711536  |
| CN1 | 1967432 | C | G | 00 | 10 | 9  | 0.477 | downstream | Cu61027590 | 35011888  |
| CN1 | 1967477 | T | C | 00 | 8  | 10 | 0.487 | downstream | Cu61027590 | 34811843  |
| CN1 | 1967402 | T | C | 00 | 8  | 12 | 0.574 | downstream | Cu61027590 | 34311818  |
| CN1 | 1967497 | T | A | 00 | 9  | 12 | 0.6   | downstream | Cu61027590 | 34811813  |
| CN1 | 1967408 | A | G | 00 | 8  | 10 | 0.6   | downstream | Cu61027590 | 34411812  |
| CN1 | 1967411 | C | A | 00 | 8  | 10 | 0.6   | downstream | Cu61027590 | 34811805  |
| CN1 | 1967428 | T | G | 00 | 9  | 13 | 0.722 | downstream | Cu61027590 | 34411292  |
| CN1 | 1967463 | G | A | 00 | 8  | 10 | 0.616 | downstream | Cu61027590 | 34761277  |
| CN1 | 1967465 | C | G | 00 | 6  | 13 | 0.682 | downstream | Cu61027590 | 34911285  |
| CN1 | 1967415 | T | A | 00 | 8  | 10 | 0.6   | downstream | Cu61027590 | 37411286  |
| CN1 | 1967411 | T | C | 00 | 10 | 8  | 0.444 | downstream | Cu61027590 | 37411269  |
| CN1 | 1967478 | T | A | 00 | 8  | 8  | 0.4   | downstream | Cu61027590 | 38111242  |
| CN1 | 1967462 | A | G | 00 | 8  | 6  | 0.4   | downstream | Cu61027590 | 38111238  |
| CN1 | 1967475 | G | A | 00 | 8  | 7  | 0.487 | downstream | Cu61027590 | 38811241  |
| CN1 | 1967493 | A | C | 00 | 6  | 7  | 0.473 | downstream | Cu61027590 | 39111237  |
| CN1 | 1967422 | A | G | 00 | 6  | 7  | 0.476 | downstream | Cu61027590 | 39111248  |
| CN1 | 1967461 | T | G | 00 | 6  | 8  | 0.533 | downstream | Cu61027590 | 40411269  |
| CN1 | 1967481 | A | G | 00 | 6  | 8  | 0.436 | downstream | Cu61027590 | 41311239  |
| CN1 | 1967462 | T | A | 00 | 10 | 10 | 0.333 | downstream | Cu61027590 | 41711219  |
| CN1 | 1967461 | A | T | 00 | 10 | 5  | 0.333 | downstream | Cu61027590 | 41711217  |
| CN1 | 1967467 | T | A | 00 | 10 | 5  | 0.333 | downstream | Cu61027590 | 42011243  |
| CN1 | 1967468 | A | G | 00 | 6  | 4  | 0.307 | downstream | Cu61027590 | 42011242  |
| CN1 | 1967475 | T | A | 00 | 7  | 4  | 0.307 | downstream | Cu61027590 | 42011241  |
| CN1 | 1967434 | T | A | 00 | 7  | 4  | 0.401 | downstream | Cu61027590 | 42711236  |
| CN1 | 1967444 | C | G | 00 | 7  | 8  | 0.5   | downstream | Cu61027590 | 42711236  |
| CN1 | 1967420 | A | C | 00 | 7  | 8  | 0.533 | downstream | Cu61027590 | 43011270  |
| CN1 | 1967462 | T | A | 00 | 8  | 8  | 0.533 | downstream | Cu61027590 | 43011238  |
| CN1 | 1967465 | G | T | 00 | 8  | 8  | 0.5   | downstream | Cu61027590 | 43911235  |
| CN1 | 1967461 | C | A | 00 | 8  | 8  | 0.5   | downstream | Cu61027590 | 43911237  |
| CN1 | 1967459 | C | T | 00 | 7  | 16 | 0.697 | downstream | Cu61027590 | 43911261  |
| CN1 | 1967464 | A | G | 00 | 9  | 16 | 0.64  | downstream | Cu61027590 | 47211236  |
| CN1 | 1967459 | G | A | 00 | 10 | 11 | 0.728 | downstream | Cu61027590 | 48211291  |
| CN1 | 1967459 | A | G | 00 | 10 | 11 | 0.728 | downstream | Cu61027590 | 48211299  |
| CN1 | 1967455 | A | G | 00 | 10 | 10 | 0.56  | downstream | Cu61027590 | 48411265  |
| CN1 | 1967476 | C | G | 00 | 10 | 10 | 0.614 | downstream | Cu61027590 | 48911244  |
| CN1 | 1967501 | C | T | 00 | 10 | 17 | 0.296 | downstream | Cu61027590 | 49311239  |
| CN1 | 1967499 | A | A | 00 | 10 | 8  | 0.5   | downstream | Cu61027590 | 50111238  |
| CN1 | 1967501 | C | G | 00 | 10 | 12 | 0.505 | downstream | Cu61027590 | 50111339  |
| CN1 | 1967509 | T | A | 00 | 10 | 12 | 0.502 | downstream | Cu61027590 | 50211331  |
| CN1 | 1967524 | T | A | 00 | 10 | 5  | 0.75  | downstream | Cu61027590 | 54711246  |
| CN1 | 1967505 | T | A | 00 | 10 | 10 | 0.263 | downstream | Cu61027590 | 54711241  |
| CN1 | 1967533 | T | C | 00 | 12 | 9  | 0.436 | downstream | Cu61027590 | 56610887  |
| CN1 | 1967525 | G | A | 00 | 12 | 9  | 0.436 | downstream | Cu61027590 | 56810865  |
| CN1 | 1967520 | G | T | 00 | 10 | 10 | 0.582 | downstream | Cu61027590 | 57510900  |
| CN1 | 1967544 | T | A | 00 | 10 | 8  | 0.5   | downstream | Cu61027590 | 58691115  |
| CN1 | 1967574 | A | G | 00 | 11 | 12 | 0.517 | downstream | Cu61027590 | 59711146  |
| CN1 | 1967561 | C | A | 00 | 11 | 9  | 0.45  | downstream | Cu61027590 | 59411039  |
| CN1 | 1967561 | C | A | 00 | 11 | 9  | 0.476 | downstream | Cu61027590 | 59411037  |
| CN1 | 1967498 | G | A | 00 | 11 | 14 | 0.56  | downstream | Cu61027590 | 74210900  |
| CN1 | 1967528 | A | G | 00 | 10 | 8  | 0.557 | downstream | Cu61027590 | 74711042  |
| CN1 | 1967562 | C | G | 00 | 10 | 16 | 0.614 | downstream | Cu61027590 | 74910858  |
| CN1 | 1967568 | A | G | 00 | 10 | 8  | 0.739 | downstream | Cu61027590 | 77211012  |
| CN1 | 1967568 | A | C | 00 | 7  | 6  | 0.401 | downstream | Cu61027590 | 77411011  |
| CN1 | 1967568 | A | T | 00 | 7  | 6  | 0.401 | downstream | Cu61027590 | 77411010  |
| CN1 | 1967561 | A | T | 00 | 7  | 6  | 0.5   | downstream | Cu61027590 | 77411009  |
| CN1 | 1967527 | C | T | 00 | 10 | 9  | 0.477 | downstream | Cu61027590 | 77810893  |
| CN1 | 1967566 | G | A | 00 | 10 | 10 | 0.478 | downstream | Cu61027590 | 77910854  |
| CN1 | 1967562 | G | A | 00 | 10 | 9  | 0.386 | downstream | Cu61027590 | 78110838  |
| CN1 | 1967564 | T | A | 00 | 10 | 10 | 0.421 | downstream | Cu61027590 | 78711036  |
| CN1 | 1967550 | C | T | 00 | 10 | 13 | 0.445 | downstream | Cu61027590 | 78910910  |
| CN1 | 1967564 | T | C | 00 | 10 | 10 | 0.401 | downstream | Cu61027590 | 78910974  |
| CN1 | 1967570 | T | C | 00 | 8  | 8  | 0.524 | downstream | Cu61027590 | 79211078  |
| CN1 | 1967539 | T | A | 00 | 6  | 10 | 0.425 | downstream | Cu61027590 | 79611010  |
| CN1 | 1967539 | G | T | 00 | 6  | 7  | 0.585 | downstream | Cu61027590 | 79611011  |
| CN1 | 1967539 | G | T | 00 | 6  | 7  | 0.621 | downstream | Cu61027590 | 80011011  |
| CN1 | 1967512 | G | A | 00 | 8  | 6  | 0.467 | downstream | Cu61027590 | 80011008  |
| CN1 | 1967513 | G | A | 00 | 8  | 6  | 0.5   | downstream | Cu61027590 | 80011002  |
| CN1 | 1967561 | G | T | 00 | 8  | 6  | 0.5   | downstream | Cu61027590 | 80011009  |
| CN1 | 1967514 | C | T | 00 | 3  | 6  | 0.733 | downstream | Cu61027590 | 82711046  |
| CN1 | 1967570 | T | A | 00 | 3  | 10 | 0.75  | downstream | Cu61027590 | 83011030  |
| CN1 | 1967501 | C | T | 00 | 10 | 11 | 0.425 | downstream | Cu61027590 | 83311033  |
| CN1 | 1967517 | C | A | 00 | 2  | 11 | 0.707 | downstream | Cu61027590 | 83310331  |
| CN1 | 1967568 | C | A | 00 | 2  | 10 | 0.425 | downstream | Cu61027590 | 84411011  |
| CN1 | 1967547 | T | A | 00 | 7  | 6  | 0.401 | downstream | Cu61027590 | 84711076  |
| CN1 | 1967564 | G | G | 00 | 2  | 14 | 0.5   | downstream | Cu61027590 | 84811073  |
| CN1 | 1967564 | G | G | 00 | 2  | 14 | 0.778 | downstream | Cu61027590 | 85011011  |
| CN1 | 1967562 | G | A | 00 | 11 | 8  | 0.5   | downstream | Cu61027590 | 85011008  |
| CN1 | 1967561 | T | C | 00 | 10 | 6  | 0.473 | downstream | Cu61027590 | 85011008  |
| CN1 | 1967561 | T | C | 00 | 10 | 6  | 0.473 | downstream | Cu61027590 | 85211011  |
| CN1 | 1967561 | C | A | 00 | 10 | 6  |       |            |            |           |

|      |         |   |   |    |    |    |       |            |                    |          |                 |
|------|---------|---|---|----|----|----|-------|------------|--------------------|----------|-----------------|
| Chr1 | 1484478 | C | T | 0% | 2  | 9  | 8.832 | missense   | Cu1G07786Cu1G07786 | 14811242 |                 |
| Chr1 | 1484530 | T | A | 0% | 8  | 8  | 8.864 | missense   | Cu1G07786Cu1G07786 | 14812311 |                 |
| Chr1 | 1484532 | A | T | 0% | 6  | 6  | 8.7   | missense   | Cu1G07786Cu1G07786 | 14812328 |                 |
| Chr1 | 1484545 | T | C | 0% | 8  | 7  | 8.867 | missense   | Cu1G07786Cu1G07786 | 14812377 |                 |
| Chr1 | 1484552 | T | C | 0% | 8  | 7  | 8.867 | missense   | Cu1G07786Cu1G07786 | 14812388 |                 |
| Chr1 | 1484561 | C | T | 0% | 8  | 7  | 8.868 | missense   | Cu1G07786Cu1G07786 | 14812408 |                 |
| Chr1 | 1484599 | C | T | 0% | 8  | 7  | 8.886 | missense   | Cu1G07786Cu1G07786 | 14812448 |                 |
| Chr1 | 1484638 | A | C | 0% | 11 | 11 | 8.611 | synonymous | Cu1G07786          | 14812458 |                 |
| Chr1 | 1485135 | T | C | 0% | 9  | 8  | 8.796 | synonic    | Cu1G07786          |          |                 |
| Chr1 | 1485137 | T | C | 0% | 8  | 8  | 8.1   | synonic    | Cu1G07786          |          |                 |
| Chr1 | 1485143 | C | T | 0% | 7  | 8  | 8.533 | synonic    | Cu1G07786          |          |                 |
| Chr1 | 1485145 | T | C | 0% | 7  | 12 | 8.789 | synonic    | Cu1G07786          |          |                 |
| Chr1 | 1485603 | C | T | 0% | 4  | 8  | 8.667 | missense   | Cu1G07786          |          |                 |
| Chr1 | 1485605 | T | C | 0% | 4  | 8  | 8.663 | missense   | Cu1G07786          |          |                 |
| Chr1 | 1485661 | G | C | 0% | 4  | 9  | 8.653 | missense   | Cu1G07786          |          |                 |
| Chr1 | 1485664 | T | C | 0% | 4  | 9  | 8.733 | missense   | Cu1G07786          |          |                 |
| Chr1 | 1485684 | C | T | 0% | 4  | 9  | 8.653 | missense   | Cu1G07786          |          |                 |
| Chr1 | 1485685 | G | C | 0% | 4  | 9  | 8.653 | missense   | Cu1G07786          |          |                 |
| Chr1 | 1485626 | T | C | 0% | 4  | 11 | 8.733 | missense   | Cu1G07786          |          |                 |
| Chr1 | 1485627 | T | C | 0% | 3  | 9  | 8.762 | missense   | Cu1G07786          |          |                 |
| Chr1 | 1485629 | A | T | 0% | 3  | 9  | 8.75  | synonic    | Cu1G07786          |          |                 |
| Chr1 | 1485631 | T | C | 0% | 3  | 9  | 8.629 | missense   | Cu1G07786          |          |                 |
| Chr1 | 1485638 | A | G | 0% | 5  | 5  | 8.495 | missense   | Cu1G07786          |          |                 |
| Chr1 | 1485639 | T | C | 0% | 6  | 5  | 8.495 | missense   | Cu1G07786          |          |                 |
| Chr1 | 1485621 | T | A | 0% | 4  | 4  | 8.566 | missense   | Cu1G07786          |          |                 |
| Chr1 | 1485678 | T | C | 0% | 12 | 6  | 8.323 | missense   | Cu1G07786          |          |                 |
| Chr1 | 1485639 | A | G | 0% | 14 | 7  | 8.333 | missense   | Cu1G07786          |          |                 |
| Chr1 | 1485646 | T | C | 0% | 14 | 10 | 8.467 | missense   | Cu1G07786          |          |                 |
| Chr1 | 1485661 | C | G | 0% | 13 | 9  | 8.495 | missense   | Cu1G07786          |          |                 |
| Chr1 | 1485666 | T | C | 0% | 13 | 9  | 8.495 | missense   | Cu1G07786          |          |                 |
| Chr1 | 1485629 | A | G | 0% | 8  | 7  | 8.467 | missense   | Cu1G07786          |          |                 |
| Chr1 | 1485659 | T | C | 0% | 8  | 7  | 8.467 | missense   | Cu1G07786          |          |                 |
| Chr1 | 1485665 | T | C | 0% | 11 | 8  | 8.211 | missense   | Cu1G07786          |          |                 |
| Chr1 | 1485747 | T | A | 0% | 10 | 5  | 8.323 | missense   | Cu1G07786          |          |                 |
| Chr1 | 1485722 | A | G | 0% | 4  | 9  | 8.653 | synonic    | Cu1G07786          |          |                 |
| Chr1 | 1485776 | C | T | 0% | 8  | 6  | 8.426 | downstream | Cu1G07786          |          | openreading_5V5 |
| Chr1 | 1485775 | G | C | 0% | 8  | 6  | 8.426 | downstream | Cu1G07786          |          |                 |
| Chr1 | 1485781 | A | G | 0% | 8  | 7  | 8.467 | downstream | Cu1G07786          |          |                 |
| Chr1 | 1485745 | T | C | 0% | 7  | 7  | 8.5   | downstream | Cu1G07786          |          |                 |
| Chr1 | 1485759 | T | C | 0% | 5  | 7  | 8.667 | downstream | Cu1G07786          |          |                 |
| Chr1 | 1485759 | T | G | 0% | 5  | 7  | 8.553 | missense   | Cu1G07786          |          |                 |
| Chr1 | 1485754 | T | C | 0% | 5  | 8  | 8.614 | downstream | Cu1G07786          |          |                 |
| Chr1 | 1485759 | T | A | 0% | 5  | 7  | 8.553 | missense   | Cu1G07786          |          |                 |
| Chr1 | 1485762 | T | C | 0% | 5  | 7  | 8.585 | downstream | Cu1G07786          |          |                 |
| Chr1 | 1485767 | T | C | 0% |    |    |       |            |                    |          |                 |

[illegible]

[illegible]

[illegible]

[illegible]

[illegible]

|         |   |   |    |    |    |        |           |                        |                      |  |                                        |
|---------|---|---|----|----|----|--------|-----------|------------------------|----------------------|--|----------------------------------------|
| 2370004 | C | T | 00 | 6  | 8  | 0.4947 | integrate | CuAg5187004CuAg5187000 | 2387.2043            |  |                                        |
| 2611889 | C | T | 00 | 9  | 8  | 0.4946 | integrate | CuAg5187004CuAg5187000 | 5428.2043            |  |                                        |
| 2611890 | C | T | 00 | 9  | 8  | 0.4786 | integrate | CuAg5187004CuAg5187000 | 5612.2043            |  |                                        |
| 2613946 | C | T | 00 | 15 | 10 | 0.4    | diversify | CuAg5187004            |                      |  |                                        |
| 2617248 | C | T | 00 | 7  | 10 | 0.6111 | integrate | CuAg5177004CuAg5177000 | 6276.0043            |  |                                        |
| 2661493 | C | T | 00 | 7  | 10 | 0.4867 | integrate | CuAg5177004CuAg5177000 | 9902.8046            |  |                                        |
| 2661712 | C | T | 00 | 7  | 10 | 0.4861 | integrate | CuAg5177004CuAg5177000 | 9881.7043            |  |                                        |
| 2661713 | G | A | 00 | 16 | 10 | 0.3371 | integrate | CuAg5176004CuAg5176000 | 3886.7582            |  |                                        |
| 2665596 | C | T | 00 | 7  | 10 | 0.4867 | integrate | CuAg5177004            |                      |  |                                        |
| 2791534 | A | G | 00 | 17 | 8  | 0.32   | integrate | CuAg5176004CuAg5176000 | 3960.8079            |  |                                        |
| 2791601 | C | T | 00 | 10 | 8  | 0.3766 | diversify | CuAg5177128            |                      |  |                                        |
| 2792277 | C | T | 00 | 6  | 6  | 0.4849 | UTER      | CuAg5172000            | CuAg5172000-1-180C-T |  |                                        |
| 2791584 | C | T | 00 | 10 | 8  | 0.4548 | integrate | CuAg5172000            |                      |  |                                        |
| 2837366 | C | T | 00 | 11 | 10 | 0.3907 | integrate | CuAg5174000            |                      |  |                                        |
| 2844484 | C | T | 00 | 12 | 12 | 0.4901 | integrate | CuAg5185004CuAg5185000 | 666.2117             |  |                                        |
| 2847441 | A | G | 00 | 16 | 8  | 0.3977 | integrate | CuAg5185004CuAg5185000 | 692.8235             |  |                                        |
| 2847929 | C | T | 00 | 11 | 10 | 0.3889 | integrate | CuAg5185004CuAg5185000 | 779.2494             |  |                                        |
| 2892536 | C | T | 00 | 20 | 15 | 0.4267 | integrate | CuAg5174000            |                      |  |                                        |
| 2897797 | C | T | 00 | 11 | 12 | 0.4211 | integrate | CuAg5176004CuAg5176000 | 360.1516             |  |                                        |
| 2924267 | T | C | 00 | 13 | 9  | 0.4891 | integrate | CuAg5186004CuAg5186000 | 3372.3028            |  |                                        |
| 2924267 | T | C | 00 | 13 | 9  | 0.4885 | integrate | CuAg5186004CuAg5186000 | 3378.3022            |  |                                        |
| 2924262 | A | G | 00 | 10 | 7  | 0.4118 | integrate | CuAg5186004CuAg5186000 | 3730.3615            |  |                                        |
| 2924261 | A | G | 00 | 10 | 7  | 0.4129 | integrate | CuAg5186004CuAg5186000 | 3736.3612            |  |                                        |
| 2924267 | T | C | 00 | 10 | 7  | 0.4117 | integrate | CuAg5186004CuAg5186000 | 3732.3648            |  |                                        |
| 2924265 | T | C | 00 | 10 | 7  | 0.4047 | integrate | CuAg5186004CuAg5186000 | 3739.3630            |  |                                        |
| 2924269 | A | G | 00 | 7  | 5  | 0.4047 | integrate | CuAg5186004CuAg5186000 | 3734.3626            |  |                                        |
| 2966149 | C | T | 00 | 9  | 5  | 0.4272 | integrate | CuAg5178004            |                      |  | CuAg5178004CuAg5178000-1-200C-T-p1346L |
| 3023242 | C | T | 00 | 6  | 7  | 0.4867 | integrate | CuAg5172004CuAg5172000 | 2126.7511            |  |                                        |
| 3074611 | C | T | 00 | 10 | 7  | 0.3371 | integrate | CuAg5176004CuAg5176000 | 1537.2074            |  |                                        |
| 3081438 | C | T | 00 | 11 | 5  | 0.3322 | integrate | CuAg5176000            |                      |  |                                        |
| 3081439 | C | T | 00 | 11 | 5  | 0.3322 | integrate | CuAg5176000            |                      |  |                                        |
| 3117277 | C | T | 00 | 13 | 15 | 0.385  | integrate | CuAg5173004CuAg5173000 | 4212.2996            |  |                                        |
| 3157408 | C | T | 00 | 9  | 15 | 0.4225 | integrate | CuAg5222000            |                      |  |                                        |
| 3220221 | C | T | 00 | 7  | 6  | 0.4667 | integrate | CuAg5222000            | 8304.2411            |  |                                        |
| 3242728 | C | T | 00 | 6  | 6  | 0.4667 | integrate | CuAg5222000            |                      |  |                                        |
| 3287498 | C | A | 00 | 6  | 6  | 0.5027 | integrate | CuAg5227000            |                      |  |                                        |
| 3448919 | C | T | 00 | 6  | 6  | 0.4134 | integrate | CuAg5177000            |                      |  | integrate_SNV                          |
| 3505119 | C | T | 00 | 6  | 11 | 0.4971 | integrate | CuAg5177000            |                      |  |                                        |
| 3505120 | C | T | 00 | 6  | 11 | 0.4971 | integrate | CuAg5177000            |                      |  |                                        |
| 3505121 | C | T | 00 | 6  | 11 | 0.4971 | integrate | CuAg5177000            |                      |  |                                        |
| 3505122 | C | T |    |    |    |        |           |                        |                      |  |                                        |

[illegible]

|      |         |   |   |    |    |    |        |          |                      |            |  |  |
|------|---------|---|---|----|----|----|--------|----------|----------------------|------------|--|--|
| CuS1 | 1240031 | T | C | 00 | 8  | 7  | 0.4667 | integrat | CuS1200320CuS1000370 | 7171.1212  |  |  |
| CuS1 | 1244091 | T | A | 00 | 9  | 9  | 0.3077 | integrat | CuS1200370CuS1000380 | 23408.718  |  |  |
| CuS1 | 1244094 | T | A | 00 | 9  | 9  | 0.3077 | integrat | CuS1200370CuS1000380 | 23408.717  |  |  |
| CuS1 | 1250136 | T | A | 00 | 11 | 11 | 0.1123 | integrat | CuS1200380CuS1000390 | 16997.7099 |  |  |
| CuS1 | 1250809 | A | C | 00 | 13 | 12 | 0.4001 | integrat | CuS1200400CuS1001340 | 21948.807  |  |  |
| CuS1 | 1250140 | A | C | 00 | 10 | 10 | 0.4503 | integrat | CuS1200400CuS1000390 | 16103.0088 |  |  |
| CuS1 | 1250136 | A | G | 11 | 13 | 10 | 0.65   | integrat | CuS1200400CuS1000390 | 10317.0089 |  |  |
| CuS1 | 1302209 | A | C | 00 | 11 | 10 | 0.1468 | integrat | CuS1200400CuS1001340 | 11310.0041 |  |  |
| CuS1 | 1303277 | A | C | 11 | 28 | 16 | 0.3333 | integrat | CuS1200410           | -          |  |  |
| CuS1 | 1308017 | A | C | 00 | 12 | 13 | 0.3333 | integrat | CuS1200400CuS1000390 | 11310.7089 |  |  |
| CuS1 | 1324498 | C | T | 00 | 16 | 7  | 0.3043 | integrat | CuS1200400CuS1000370 | 4703.1249  |  |  |
| CuS1 | 1324302 | C | T | 00 | 11 | 11 | 0.4231 | integrat | CuS1200400CuS1000370 | 4703.1245  |  |  |
| CuS1 | 1324320 | G | A | 00 | 15 | 18 | 0.4503 | integrat | CuS1200400CuS1000370 | 4703.1237  |  |  |
| CuS1 | 1324321 | C | T | 00 | 16 | 17 | 0.1123 | integrat | CuS1200400CuS1000370 | 4703.1236  |  |  |
| CuS1 | 1324324 | A | G | 00 | 16 | 18 | 0.3294 | integrat | CuS1200400CuS1000370 | 4703.1233  |  |  |
| CuS1 | 1324347 | A | C | 00 | 12 | 13 | 0.3333 | integrat | CuS1200400CuS1000370 | 7113.0090  |  |  |
| CuS1 | 1337279 | C | T | 00 | 9  | 6  | 0.4    | integrat | CuS1200400CuS1000390 | 3279.2622  |  |  |
| CuS1 | 1337274 | A | C | 00 | 9  | 6  | 0.3333 | integrat | CuS1200400CuS1000390 | 3279.2617  |  |  |
| CuS1 | 1337277 | G | T | 00 | 10 | 6  | 0.375  | integrat | CuS1200400CuS1000390 | 3277.2614  |  |  |
| CuS1 | 1337280 | A | C | 00 | 10 | 5  | 0.3333 | integrat | CuS1200400CuS1000390 | 3279.2601  |  |  |
| CuS1 | 1337247 | T | C | 00 | 10 | 5  | 0.3333 | integrat | CuS1200400CuS1000390 | 3277.2604  |  |  |
| CuS1 | 1342461 | G | T | 00 | 11 | 7  | 0.3122 | integrat | CuS1200400CuS1000390 | 5208.423   |  |  |
| CuS1 | 1342416 | G | A | 00 | 14 | 11 | 0.44   | integrat | CuS1200400CuS1000390 | 802.758251 |  |  |
| CuS1 | 1343451 | T | C | 00 | 13 | 11 | 0.4503 | integrat | CuS1200400CuS1000390 | 802.2599   |  |  |
| CuS1 | 1343452 | A | C | 00 | 13 | 11 | 0.4503 | integrat | CuS1200400CuS1000390 | 802.2599   |  |  |
| CuS1 | 1343202 | A | G | 00 | 16 | 8  | 0.3333 | integrat | CuS1200400CuS1000370 | 11221.2599 |  |  |
| CuS1 | 1343497 | A | C | 00 | 8  | 8  | 0.5556 | integrat | CuS1200400CuS1000370 | 4062.5566  |  |  |
| CuS1 | 1343506 | C | T | 00 | 10 | 12 | 0.545  | integrat | CuS1200400CuS1000370 | 4971.577   |  |  |
| CuS1 | 1376236 | A | C | 00 | 15 | 8  | 0.375  | integrat | CuS1200400CuS1000370 | 25492.2033 |  |  |
| CuS1 | 1375739 | A | G | 11 | 18 | 0  | 1      | integrat | CuS1200400CuS1000370 | 413.4494   |  |  |
| CuS1 | 1375740 | A | C | 11 | 19 | 1  | 1      | integrat | CuS1200400CuS1000370 | 413.4492   |  |  |
| CuS1 | 1375943 | T | C | 11 | 18 | 0  | 1      | integrat | CuS1200400CuS1000370 | 414.4490   |  |  |
| CuS1 | 1375941 | A | C | 11 | 17 | 0  | 1      | integrat | CuS1200400CuS1000370 | 414.4477   |  |  |
| CuS1 | 1355431 | G | T | 00 | 11 | 5  | 0.3122 | integrat | CuS1200400CuS1000370 | 1044.676   |  |  |
| CuS1 | 1355427 | A | C | 00 | 12 | 6  | 0.3333 | integrat | CuS1200400CuS1000370 | 1047.6773  |  |  |
| CuS1 | 1355438 | G | A | 00 |    |    |        |          |                      |            |  |  |

|     |         |   |   |   |    |   |       |          |                    |          |
|-----|---------|---|---|---|----|---|-------|----------|--------------------|----------|
| Cms | 1308794 | A | T | D | 8  | 5 | 6459  | integrat | CmsG2427C-CmsG2428 | 2076260  |
| Cms | 1308795 | A | T | D | 8  | 5 | 6459  | integrat | CmsG2427C-CmsG2428 | 2076199  |
| Cms | 1308814 | A | T | D | 12 | 4 | 876   | integrat | CmsG2427C-CmsG2428 | 2194376  |
| Cms | 1308876 | G | T | D | 12 | 4 | 8707  | integrat | CmsG2427C-CmsG2428 | 21021114 |
| Cms | 1301123 | G | A | D | 10 | 3 | 7502  | integrat | CmsG2427C-CmsG2428 | 21091071 |
| Cms | 1301122 | G | T | D | 9  | 3 | 876   | integrat | CmsG2427C-CmsG2428 | 21021462 |
| Cms | 1301144 | A | T | D | 9  | 2 | 8102  | integrat | CmsG2427C-CmsG2428 | 2040100  |
| Cms | 1301171 | T | C | D | 9  | 3 | 8102  | integrat | CmsG2427C-CmsG2428 | 21401021 |
| Cms | 1301176 | T | A | D | 9  | 2 | 8102  | integrat | CmsG2427C-CmsG2428 | 21021103 |
| Cms | 1301181 | T | C | D | 9  | 3 | 8102  | integrat | CmsG2427C-CmsG2428 | 21071003 |
| Cms | 1301270 | A | T | D | 11 | 3 | 7507  | integrat | CmsG2427C-CmsG2428 | 21061124 |
| Cms | 1301301 | T | C | D | 13 | 3 | 8600  | integrat | CmsG2427C-CmsG2428 | 21771003 |
| Cms | 1301316 | A | C | D | 13 | 3 | 8123  | integrat | CmsG2427C-CmsG2428 | 21021170 |
| Cms | 1301330 | T | C | D | 16 | 4 | 876   | integrat | CmsG2427C-CmsG2428 | 21021144 |
| Cms | 1301386 | T | C | D | 18 | 7 | 876   | integrat | CmsG2427C-CmsG2428 | 20411026 |
| Cms | 1301391 | G | T | D | 18 | 4 | 8723  | integrat | CmsG2427C-CmsG2428 | 20071003 |
| Cms | 1301406 | T | A | D | 16 | 7 | 8697  | integrat | CmsG2427C-CmsG2428 | 20021108 |
| Cms | 1301420 | A | G | D | 18 | 4 | 876   | integrat | CmsG2427C-CmsG2428 | 20081174 |
| Cms | 1301445 | T | G | D | 19 | 6 | 876   | integrat | CmsG2427C-CmsG2428 | 21721169 |
| Cms | 1301459 | T | G | D | 20 | 4 | 876   | integrat | CmsG2427C-CmsG2428 | 21701151 |
| Cms | 1301468 | T | G | D | 20 | 5 | 876   | integrat | CmsG2427C-CmsG2428 | 21741126 |
| Cms | 1301475 | A | G | D | 22 | 4 | 876   | integrat | CmsG2427C-CmsG2428 | 21081121 |
| Cms | 1301524 | C | T | D | 19 | 2 | 8600  | integrat | CmsG2427C-CmsG2428 | 20081170 |
| Cms | 1301535 | A | G | D | 19 | 2 | 8600  | integrat | CmsG2427C-CmsG2428 | 20081162 |
| Cms | 1301546 | G | T | D | 19 | 2 | 8600  | integrat | CmsG2427C-CmsG2428 | 20221126 |
| Cms | 1301561 | A | G | D | 17 | 4 | 876   | integrat | CmsG2427C-CmsG2428 | 21071123 |
| Cms | 1301563 | A | G | D | 16 | 4 | 876   | integrat | CmsG2427C-CmsG2428 | 21091121 |
| Cms | 1301565 | A | G | D | 19 | 4 | 876   | integrat | CmsG2427C-CmsG2428 | 21091171 |
| Cms | 1301587 | T | C | D | 19 | 4 | 876   | integrat | CmsG2427C-CmsG2428 | 21011127 |
| Cms | 1301623 | A | G | D | 24 | 4 | 876   | integrat | CmsG2427C-CmsG2428 | 20211009 |
| Cms | 1301747 | A | G | D | 23 | 5 | 876   | integrat | CmsG2427C-CmsG2428 | 20411121 |
| Cms | 1301754 | C | T | D | 17 | 2 | 8967  | integrat | CmsG2427C-CmsG2428 | 20021109 |
| Cms | 1301759 | C | G | D | 17 | 2 | 8967  | integrat | CmsG2427C-CmsG2428 | 20021105 |
| Cms | 1301770 | C | G | D | 14 | 2 | 8723  | integrat | CmsG2427C-CmsG2428 | 20091003 |
| Cms | 1301809 | C | T | D | 14 | 2 | 8723  | integrat | CmsG2428           | -        |
| Cms | 1301812 | A | C | D | 14 | 2 | 8723  | integrat | CmsG2428           | -        |
| Cms | 1302120 | T | G | D | 10 | 8 | 8756  | integrat | CmsG2428           | -        |
| Cms | 1302126 | G | T | D | 8  | 8 | 8756  | integrat | CmsG2428           | -        |
| Cms | 1302129 | T | A | D | 8  | 5 | 8124  | integrat | CmsG2428           | -        |
| Cms | 1302201 | A | G | D | 7  | 8 | 876   | integrat | CmsG2428           | -        |
| Cms | 1302209 | A | T | D | 6  | 5 | 8401  | integrat | CmsG2428           | -        |
| Cms | 1302408 | A | G | D | 20 | 4 | 8723  | integrat | CmsG2428           | -        |
| Cms | 1302506 | C | G | D | 14 | 5 | 7708  | decompos | CmsG2428           | -        |
| Cms | 1301108 | T | C | D | 12 | 4 | 876</ |          |                    |          |

[illegible]

|     |        |   |   |    |    |    |        |           |                         |           |
|-----|--------|---|---|----|----|----|--------|-----------|-------------------------|-----------|
| Csv | 342670 | G | C | 09 | 4  | 8  | 0.0667 | integrare | CsvG042909C-CsvG042909C | 346133237 |
| Csv | 342670 | G | C | 09 | 4  | 8  | 0.0667 | integrare | CsvG042909C-CsvG042909C | 347633238 |
| Csv | 342669 | T | C | 09 | 11 | 8  | 0.0471 | integrare | CsvG042909C-CsvG042909C | 348333070 |
| Csv | 342669 | T | C | 09 | 11 | 8  | 0.0471 | integrare | CsvG042909C-CsvG042909C | 348333084 |
| Csv | 342670 | C | T | 09 | 3  | 8  | 0.7273 | integrare | CsvG042909C-CsvG042909C | 348333083 |
| Csv | 342706 | G | C | 09 | 7  | 8  | 0.0344 | integrare | CsvG042909C-CsvG042909C | 400438880 |
| Csv | 342709 | T | C | 09 | 4  | 8  | 0.0471 | integrare | CsvG042909C-CsvG042909C | 400438880 |
| Csv | 342713 | G | C | 09 | 7  | 8  | 0.0471 | integrare | CsvG042909C-CsvG042909C | 400438880 |
| Csv | 342716 | A | T | 09 | 6  | 10 | 0.6227 | integrare | CsvG042909C-CsvG042909C | 412630770 |
| Csv | 342716 | G | C | 09 | 6  | 10 | 0.6227 | integrare | CsvG042909C-CsvG042909C | 412630770 |
| Csv | 342729 | T | A | 09 | 3  | 6  | 0.2451 | integrare | CsvG042909C-CsvG042909C | 400438880 |
| Csv | 342729 | G | C | 09 | 3  | 6  | 0.2451 | integrare | CsvG042909C-CsvG042909C | 400438880 |
| Csv | 342739 | A | G | 09 | 4  | 8  | 0.0523 | integrare | CsvG042909C-CsvG042909C | 400438880 |
| Csv | 342739 | G | C | 09 | 4  | 8  | 0.0523 | integrare | CsvG042909C-CsvG042909C | 400438880 |
| Csv | 342734 | C | T | 09 | 6  | 10 | 0.6227 | integrare | CsvG042909C-CsvG042909C | 412630770 |
| Csv | 342742 | G | C | 09 | 7  | 8  | 0.0344 | integrare | CsvG042909C-CsvG042909C | 400438880 |
| Csv | 342749 | A | C | 09 | 7  | 9  | 0.0362 | integrare | CsvG042909C-CsvG042909C | 400438880 |
| Csv | 342751 | C | T | 09 | 2  | 9  | 0.0362 | integrare | CsvG042909C-CsvG042909C | 400438880 |
| Csv | 342757 | C | T | 09 | 2  | 9  | 0.0362 | integrare | CsvG042909C-CsvG042909C | 400438880 |
| Csv | 342764 | G | C | 09 | 11 | 8  | 0.0471 | integrare | CsvG042909C-CsvG042909C | 400438880 |
| Csv | 342772 | C | T | 09 | 6  | 10 | 0.7343 | integrare | CsvG042909C-CsvG042909C | 400438880 |
| Csv | 342776 | T | C | 09 | 14 | 10 | 0.7343 | integrare | CsvG042909C-CsvG042909C | 400438880 |
| Csv | 342782 | T | C | 09 | 9  | 12 | 0.5774 | integrare | CsvG042909C-CsvG042909C | 400438880 |
| Csv | 342790 | G | C | 09 | 15 | 14 | 0.5301 | integrare | CsvG042909C-CsvG042909C | 400438880 |
| Csv | 342796 | G | C | 09 | 15 | 14 | 0.5301 | integrare | CsvG042909C-CsvG042909C | 400438880 |
| Csv | 342792 | G | A | 09 | 13 | 16 | 0.5557 | integrare | CsvG042909C-CsvG042909C | 400438880 |
| Csv | 342805 | C | T | 09 | 6  | 9  | 0.75   | integrare | CsvG042909C-CsvG042909C | 400438880 |
| Csv | 342805 | C | T | 09 | 6  | 9  | 0.0462 | integrare | CsvG042909C-CsvG042909C | 400438880 |
| Csv | 342822 | C | T | 09 | 5  | 9  | 0.0471 | integrare | CsvG042909C-CsvG042909C | 400438880 |
| Csv | 342826 | C | T | 09 | 5  | 9  | 0.0429 | integrare | CsvG042909C-CsvG042909C | 400438880 |
| Csv | 342822 | C | T | 09 | 5  | 9  | 0.6227 | integrare | CsvG042909C-CsvG042909C | 400438880 |
| Csv | 342818 | A | G | 09 | 5  | 12 | 0.7059 | integrare | CsvG042909C-CsvG042909C | 400438880 |
| Csv | 342818 | C | T | 09 | 5  | 12 | 0.75   | integrare | CsvG042909C-CsvG042909C | 400438880 |
| Csv | 342824 | C | T | 09 | 6  | 12 | 0.0667 | integrare | CsvG042909C-CsvG042909C | 400438880 |
| Csv | 342862 | G | C | 09 | 7  | 12 | 0.7059 | integrare | CsvG042909C-CsvG042909C | 400438880 |
| Csv | 342864 | T | C | 09 | 5  | 9  | 0.0429 | integrare | CsvG042909C-CsvG042909C | 400438880 |
| Csv | 342862 | G | C | 09 | 7  | 12 | 0.634  | integrare | CsvG042909C-CsvG042909C | 400438880 |
| Csv | 342922 | G | A | 09 | 3  | 9  | 0.75   | integrare | CsvG042909C-CsvG042909C | 400438880 |
| Csv | 342922 | G | A | 09 | 3  | 9  | 0.     |           |                         |           |



|        |        |   |     |     |    |        |          |                    |           |
|--------|--------|---|-----|-----|----|--------|----------|--------------------|-----------|
| 143200 | C      | A | 0.0 | 8   | 3  | 0.7273 | negative | CuAlFe20NiCuAlCo90 | 328612403 |
| Cha    | 143124 | G | T   | 0.0 | 6  | 0.5385 | negative | CuAlFe20NiCuAlCo90 | 212012120 |
| Cha    | 143144 | T | T   | 0.0 | 8  | 0.6023 | negative | CuAlFe20NiCuAlCo90 | 222012440 |
| Cha    | 143100 | G | T   | 0.0 | 10 | 0.7143 | negative | CuAlFe20NiCuAlCo90 | 222012470 |
| Cha    | 143137 | G | G   | 0.0 | 11 | 0.8462 | negative | CuAlFe20NiCuAlCo90 | 224212320 |
| Cha    | 143100 | T | G   | 0.0 | 3  | 0.7807 | negative | CuAlFe20NiCuAlCo90 | 224012480 |
| Cha    | 143115 | T | T   | 0.0 | 9  | 0.6023 | negative | CuAlFe20NiCuAlCo90 | 224212380 |
| Cha    | 143126 | T | C   | 0.0 | 9  | 0.6429 | negative | CuAlFe20NiCuAlCo90 | 224012480 |
| Cha    | 143108 | A | G   | 0.0 | 12 | 0.6231 | negative | CuAlFe20NiCuAlCo90 | 224012470 |
| Cha    | 143109 | A | G   | 0.0 | 12 | 0.6231 | negative | CuAlFe20NiCuAlCo90 | 224012470 |
| Cha    | 143142 | A | G   | 0.0 | 10 | 0.7143 | negative | CuAlFe20NiCuAlCo90 | 224012470 |
| Cha    | 143141 | A | G   | 0.0 | 10 | 0.7143 | negative | CuAlFe20NiCuAlCo90 | 224012470 |
| Cha    | 143140 | G | T   | 0.0 | 10 | 0.6471 | negative | CuAlFe20NiCuAlCo90 | 224012470 |
| Cha    | 143146 | A | G   | 0.0 | 10 | 0.6508 | negative | CuAlFe20NiCuAlCo90 | 224012470 |
| Cha    | 143147 | A | G   | 0.0 | 10 | 0.6471 | negative | CuAlFe20NiCuAlCo90 | 224012470 |
| Cha    | 143148 | A | G   | 0.0 | 10 | 0.6471 | negative | CuAlFe20NiCuAlCo90 | 224012470 |
| Cha    | 143149 | A | G   | 0.0 | 10 | 0.6471 | negative | CuAlFe20NiCuAlCo90 | 224012470 |
| Cha    | 143150 | A | G   | 0.0 | 10 | 0.6471 | negative | CuAlFe20NiCuAlCo90 | 224012470 |
| Cha    | 143151 | A | G   | 0.0 | 10 | 0.6471 | negative | CuAlFe20NiCuAlCo90 | 224012470 |
| Cha    | 143152 | A | G   | 0.0 | 10 | 0.6471 | negative | CuAlFe20NiCuAlCo90 | 224012470 |
| Cha    | 143153 | A | G   | 0.0 | 10 | 0.6471 | negative | CuAlFe20NiCuAlCo90 | 224012470 |
| Cha    | 143154 | A | G   | 0.0 | 10 | 0.6471 | negative | CuAlFe20NiCuAlCo90 | 224012470 |
| Cha    | 143155 | A | G   | 0.0 | 10 | 0.6471 | negative | CuAlFe20NiCuAlCo90 | 224012470 |
| Cha    | 143156 | A | G   | 0.0 | 10 | 0.6471 | negative | CuAlFe20NiCuAlCo90 | 224012470 |
| Cha    | 143157 | A | G   | 0.0 | 10 | 0.6471 | negative | CuAlFe20NiCuAlCo90 | 224012470 |
| Cha    | 143158 | A | G   | 0.0 | 10 | 0.6471 | negative | CuAlFe20NiCuAlCo90 | 224012470 |
| Cha    | 143159 | A | G   | 0.0 | 10 | 0.6471 | negative | CuAlFe20NiCuAlCo90 | 224012470 |
| Cha    | 143160 | A | G   | 0.0 | 10 | 0.6471 | negative | CuAlFe20NiCuAlCo90 | 224012470 |
| Cha    | 143161 | A | G   | 0.0 | 10 | 0.6471 | negative | CuAlFe20NiCuAlCo90 | 224012470 |
| Cha    | 143162 | A | G   | 0.0 | 10 | 0.6471 | negative | CuAlFe20NiCuAlCo90 | 224012470 |
| Cha    | 143163 | A | G   | 0.0 | 10 | 0.6471 | negative | CuAlFe20NiCuAlCo90 | 224012470 |
| Cha    | 143164 | A | G   | 0.0 | 10 | 0.6471 | negative | CuAlFe20NiCuAlCo90 | 224012470 |
| Cha    | 143165 | A | G   | 0.0 | 10 | 0.6471 | negative | CuAlFe20NiCuAlCo90 | 224012470 |
| Cha    | 143166 | A | G   | 0.0 | 10 | 0.6471 | negative | CuAlFe20NiCuAlCo90 | 224012470 |
| Cha    | 143167 | A | G   | 0.0 | 10 | 0.6471 | negative | CuAlFe20NiCuAlCo90 | 224012470 |
| Cha    | 143168 | A | G   | 0.0 | 10 | 0.6471 | negative | CuAlFe20NiCuAlCo90 | 224012470 |
| Cha    | 143169 | A | G   | 0.0 | 10 | 0.6471 | negative | CuAlFe20NiCuAlCo90 | 224012470 |
| Cha    | 143170 | A | G   | 0.0 | 10 | 0.6471 | negative | CuAlFe20NiCuAlCo90 | 224012470 |
| Cha    | 143171 | A | G   | 0.0 | 10 | 0.6471 | negative | CuAlFe20NiCuAlCo90 | 224012470 |
| Cha    | 143172 | A | G   | 0.0 | 10 | 0.6471 | negative | CuAlFe20NiCuAlCo90 | 224012470 |
| Cha    | 143173 | A | G   | 0.0 | 10 | 0.6471 | negative | CuAlFe20NiCuAlCo90 | 224012470 |
| Cha    | 143174 | A | G   | 0.0 | 10 | 0.6471 | negative | CuAlFe20NiCuAlCo90 | 224012470 |
| Cha    | 143175 | A | G   | 0.0 | 10 | 0.6471 | negative | CuAlFe20NiCuAlCo90 | 224012470 |
| Cha    | 143176 | A | G   | 0.0 | 10 | 0.6471 | negative | CuAlFe20NiCuAlCo90 | 224012470 |
| Cha    |        |   |     |     |    |        |          |                    |           |

|     |        |   |   |     |    |        |          |                       |          |  |  |
|-----|--------|---|---|-----|----|--------|----------|-----------------------|----------|--|--|
| Ch# | 371218 | A | T | 0.0 | 10 | 0.8901 | integrac | Cu#6048310 Cu#6048320 | 9180.440 |  |  |
| Ch# | 371219 | A | T | 0.0 | 11 | 0.9161 | integrac | Cu#6048310 Cu#6048320 | 9111.424 |  |  |
| Ch# | 371219 | A | T | 0.0 | 9  | 0.9162 | integrac | Cu#6048310 Cu#6048320 | 9141.424 |  |  |
| Ch# | 371219 | A | T | 0.0 | 9  | 0.9162 | integrac | Cu#6048310 Cu#6048320 | 9141.424 |  |  |
| Ch# | 371241 | C | T | 0.0 | 11 | 0.9167 | integrac | Cu#6048310 Cu#6048320 | 9111.402 |  |  |
| Ch# | 371262 | T | T | 0.0 | 11 | 0.7131 | integrac | Cu#6048310 Cu#6048320 | 9784.861 |  |  |
| Ch# | 371269 | C | G | 0.0 | 10 | 0.7963 | integrac | Cu#6048310 Cu#6048320 | 9071.073 |  |  |
| Ch# | 371306 | C | G | 0.0 | 12 | 0.8771 | integrac | Cu#6048310 Cu#6048320 | 9020.817 |  |  |
| Ch# | 371307 | A | G | 0.0 | 12 | 0.8771 | integrac | Cu#6048310 Cu#6048320 | 9020.816 |  |  |
| Ch# | 371310 | A | G | 0.0 | 12 | 0.8751 | integrac | Cu#6048310 Cu#6048320 | 9040.105 |  |  |
| Ch# | 371314 | G | A | 0.0 | 8  | 0.7173 | integrac | Cu#6048310 Cu#6048320 | 9084.379 |  |  |
| Ch# | 371321 | A | G | 0.0 | 8  | 0.7163 | integrac | Cu#6048310 Cu#6048320 | 9119.282 |  |  |
| Ch# | 371325 | A | T | 0.0 | 10 | 0.8331 | integrac | Cu#6048310 Cu#6048320 | 9024.251 |  |  |
| Ch# | 371344 | C | T | 0.0 | 11 | 0.6471 | integrac | Cu#6048310 Cu#6048320 | 9076.389 |  |  |
| Ch# | 371349 | A | G | 0.0 | 10 | 0.6967 | integrac | Cu#6048310 Cu#6048320 | 9042.903 |  |  |
| Ch# | 371374 | A | G | 0.0 | 7  | 0.6889 | integrac | Cu#6048310 Cu#6048320 | 9076.249 |  |  |
| Ch# | 371713 | T | G | 0.0 | 14 | 0.4    | integrac | Cu#6048310 Cu#6048320 | 9001.790 |  |  |
| Ch# | 371739 | C | T | 0.0 | 7  | 0.7067 | integrac | Cu#6048310 Cu#6048320 | 9072.248 |  |  |
| Ch# | 371374 | G | A | 0.0 | 10 | 0.6467 | integrac | Cu#6048310 Cu#6048320 | 9076.249 |  |  |
| Ch# | 371399 | T | G | 0.0 | 13 | 0.7947 | integrac | Cu#6048310 Cu#6048320 | 9021.254 |  |  |
| Ch# | 371391 | T | A | 0.0 | 13 | 0.4    | integrac | Cu#6048310 Cu#6048320 | 9052.242 |  |  |
| Ch# | 371397 | T | G | 0.0 | 9  | 0.6429 | integrac | Cu#6048310 Cu#6048320 | 9099.245 |  |  |
| Ch# | 371401 | A | G | 0.0 | 7  | 0.8    | integrac | Cu#6048310 Cu#6048320 | 9099.246 |  |  |
| Ch# | 371428 | C | T | 0.0 | 8  | 0.5131 | integrac | Cu#6048310 Cu#6048320 | 9099.245 |  |  |
| Ch# | 371418 | G | A | 0.0 | 10 | 0.6467 | integrac | Cu#6048310 Cu#6048320 | 9109.255 |  |  |
| Ch# | 371420 | C | T | 0.0 | 12 | 0.7799 | integrac | Cu#6048310 Cu#6048320 | 9112.238 |  |  |
| Ch# | 371424 | C | G | 0.0 | 10 | 0.6    | integrac | Cu#6048310 Cu#6048320 | 9112.239 |  |  |
| Ch# | 371424 | A | T | 0.0 | 12 | 0.8751 | integrac | Cu#6048310 Cu#6048320 | 9116.299 |  |  |
| Ch# | 371430 | A | G | 0.0 | 16 | 0.8989 | integrac | Cu#6048310 Cu#6048320 | 9117.288 |  |  |
| Ch# | 371449 | A | G | 0.0 | 18 | 0.8751 | integrac | Cu#6048310 Cu#6048320 | 9131.264 |  |  |
| Ch# | 371454 | A | G | 0.0 | 21 | 0.8987 | integrac | Cu#6048310 Cu#6048320 | 9147.978 |  |  |
| Ch# | 371457 | A | T | 0.0 | 21 | 0.8987 | integrac | Cu#6048310 Cu#6048320 | 9149.976 |  |  |
| Ch# | 371463 | A | G | 0.0 | 12 | 0.6    | integrac | Cu#6048310 Cu#6048320 | 9150.108 |  |  |
| Ch# | 371463 | T | G | 0.0 | 12 | 0.6467 | integrac | Cu#6048310 Cu#6048320 | 9171.712 |  |  |
| Ch# | 371467 | A | G | 0.0 | 11 | 0.6471 | integrac | Cu#6048310 Cu#6048320 | 9184.976 |  |  |
| Ch# | 371467 | T | G | 0.0 | 11 | 0.6467 | integrac | Cu#6048310 Cu#6048320 | 9184.976 |  |  |
| Ch# | 371509 | A | G | 0.0 | 10 | 0.7963 | integrac | Cu#6048310 Cu#6048320 | 9191.444 |  |  |
| Ch# | 371507 | C | G | 0.0 | 10 | 0.6467 | integrac | Cu#6048310 Cu#6048320 |          |  |  |

|         |         |   |    |    |    |        |            |                       |                       |           |                        |  |
|---------|---------|---|----|----|----|--------|------------|-----------------------|-----------------------|-----------|------------------------|--|
| 4118243 | A       | T | 00 | 4  | 17 | 0.8095 | inequiv    | CuB027020CuB051320    | 5111.062              |           |                        |  |
| Chs     | 411811  | C | T  | 00 | 7  | 0.5511 | inequiv    | CuB0405120            |                       |           |                        |  |
| Chs     | 4118142 | C | T  | 00 | 2  | 1.783  | inequiv    | CuB0405130            |                       |           | CuB04051320 i = 762A-C |  |
| Chs     | 4118160 | C | G  | 00 | 2  | 0.8331 | equiv      | CuB0405130            |                       |           |                        |  |
| Chs     | 4117010 | C | G  | 00 | 4  | 0.7779 | downstream | CuB0405130            |                       |           |                        |  |
| Chs     | 4118485 | A | C  | 00 | 6  | 0.70   | downstream | CuB0405130            |                       |           |                        |  |
| Chs     | 4117919 | A | T  | 11 | 17 | 0.89   | equiv      | CuB0405140            |                       |           |                        |  |
| Chs     | 4117308 | A | C  | 11 | 12 | 1      | 0.5211     | inequiv               | CuB0405140CuB04051400 | 6790.2143 |                        |  |
| Chs     | 4119009 | T | 00 | 4  | 1  | 0.5714 | equiv      |                       |                       |           |                        |  |
| Chs     | 4202723 | C | T  | 00 | 4  | 15     | 0.7805     | inequiv               | CuB0405140CuB04051400 |           |                        |  |
| Chs     | 4120294 | T | 00 | 4  | 1  | 0.5113 | downstream | CuB0405170CuB04051700 |                       |           |                        |  |
| Chs     | 4202796 | T | C  | 00 | 2  | 12     | 0.6711     | inequiv               | CuB0405180CuB04051700 | 1631.701  |                        |  |
| Chs     | 410811  | A | 00 | 4  | 1  | 0.6667 | inequiv    | CuB0405180CuB04051700 | 1836.7626             |           |                        |  |
| Chs     | 4202676 | C | G  | 00 | 3  | 8      | 0.7271     | inequiv               | CuB0405180CuB04051700 | 2123.784  |                        |  |
| Chs     | 4120522 | C | G  | 00 | 3  | 8      | 0.7271     | inequiv               | CuB0405180CuB04051700 | 2127.7351 |                        |  |
| Chs     | 4202608 | C | G  | 00 | 3  | 9      | 0.71       | inequiv               | CuB0405180CuB04051700 | 2143.7390 |                        |  |
| Chs     | 4120502 | A | 00 | 3  | 1  | 0.7962 | inequiv    | CuB0405180CuB04051700 | 2147.7351             |           |                        |  |
| Chs     | 4203533 | T | G  | 00 | 1  | 10     | 0.6061     | inequiv               | CuB0405180CuB04051700 | 2176.7394 |                        |  |
| Chs     | 4203643 | A | 00 | 1  | 10 | 0.6061 | inequiv    | CuB0405180CuB04051700 | 2206.7262             |           |                        |  |
| Chs     | 4203654 | C | G  | 00 | 1  | 10     | 0.6061     | inequiv               | CuB0405180CuB04051700 | 2206.7274 |                        |  |
| Chs     | 4203670 | C | T  | 00 | 1  | 11     | 0.6167     | inequiv               | CuB0405180CuB04051700 | 2215.7267 |                        |  |
| Chs     | 4203675 | C | T  | 00 | 1  | 11     | 0.6167     | inequiv               | CuB0405180CuB04051700 | 2220.7262 |                        |  |
| Chs     | 4204007 | T | C  | 00 | 1  | 10     | 0.6061     | inequiv               | CuB0405180CuB04051700 | 2254.7268 |                        |  |
| Chs     | 4204001 | A | 00 | 2  | 1  | 0.6462 | inequiv    | CuB0405180CuB04051700 | 2256.7146             |           |                        |  |
| Chs     | 4204077 | T | A  | 00 | 2  | 11     | 0.6367     | inequiv               | CuB0405180CuB04051700 | 2453.7064 |                        |  |
| Chs     | 4204062 | A | G  | 00 | 2  | 10     | 0.6321     | inequiv               | CuB0405180CuB04051700 | 2457.7065 |                        |  |
| Chs     | 4204061 | C | G  | 00 | 2  | 10     | 0.6367     | inequiv               | CuB0405180CuB04051700 | 2466.6996 |                        |  |
| Chs     | 4204714 | T | C  | 00 | 4  | 12     | 0.75       | inequiv               | CuB0405180CuB04051700 | 2599.6823 |                        |  |
| Chs     | 4204010 | A | G  | 00 | 2  | 11     | 0.6476     | inequiv               | CuB0405180CuB04051700 | 2664.6818 |                        |  |
| Chs     | 4204910 | G | A  | 00 | 4  | 14     | 0.6221     | inequiv               | CuB0405180CuB04051700 | 2750.6727 |                        |  |
| Chs     | 4120514 | C | T  | 00 | 2  | 1      | 0.5113     | inequiv               | CuB0405180CuB04051700 | 2805.6621 |                        |  |
| Chs     | 4202607 | T | A  | 00 | 4  | 13     | 0.7547     | inequiv               | CuB0405180CuB04051700 | 4052.6800 |                        |  |
| Chs     | 4120666 | C | G  | 00 | 3  | 9      | 0.71       | inequiv               | CuB0405180CuB04051700 | 4111.6771 |                        |  |
| Chs     | 4202608 | C | A  | 00 | 4  | 9      | 0.6923     | inequiv               | CuB0405180CuB04051700 | 4113.6667 |                        |  |
| Chs     | 4120670 | C | A  | 00 | 4  | 9      | 0.6923     | inequiv               | CuB0405180CuB04051700 | 4117.6667 |                        |  |
| Chs     | 4202676 | C | A  | 00 | 4  | 9      | 0.6923     | inequiv               | CuB0405180CuB04051700 | 4117.6667 |                        |  |
| Chs     | 4202676 | C | A  | 00 | 4  | 9      | 0.6923     | inequiv               | CuB0405180CuB04051700 | 4117.6667 |                        |  |
| Chs     | 4202697 | T | G  |    |    |        |            |                       |                       |           |                        |  |

[illegible]

[illegible]

[illegible]

CatG560710.CatM560710.1 exon1 c.881\_883del p.294\_295del

noFrameshift\_deletion

CatG560710.CatM560710.1 exon1 c.881\_883del p.294\_295del

|     |         |           |            |    |    |    |       |            |                      |           |  |
|-----|---------|-----------|------------|----|----|----|-------|------------|----------------------|-----------|--|
| CN1 | 2217977 | IG        | T          | 00 | 11 | 7  | 0.289 | downstream | CuGS273636           |           |  |
| CN1 | 2218190 | C         | CG         | 00 | 10 | 7  | 0.418 | integrate  | CuGS273636CuGS283990 | 9486.9609 |  |
| CN1 | 2218197 | TTTG      | CG         | 00 | 11 | 7  | 0.389 | integrate  | CuGS273636CuGS283990 | 9486.9609 |  |
| CN1 | 2218229 | G         | UAGACAG    | T  | 0  | 7  | 0.386 | integrate  | CuGS273636CuGS283990 | 9486.9609 |  |
| CN1 | 2624811 | CT        | C          | 00 | 10 | 7  | 0.419 | integrate  | CuGS273636CuGS283990 | 9486.9609 |  |
| CN1 | 2633861 | TA        | T          | 00 | 9  | 7  | 0.487 | integrate  | CuGS273636CuGS283990 | 9486.9609 |  |
| CN1 | 2744979 | TA        | T          | 00 | 9  | 6  | 0.4   | integrate  | CuGS273636CuGS283990 | 9486.9609 |  |
| CN1 | 2766086 | G         | GT         | 00 | 9  | 7  | 0.322 | integrate  | CuGS273636CuGS283990 | 9486.9609 |  |
| CN1 | 2814828 | C         | CT         | 11 | 6  | 7  | 0.463 | integrate  | CuGS273636CuGS283990 | 9486.9609 |  |
| CN1 | 2845862 | G         | GA         | 00 | 9  | 7  | 0.375 | downstream | CuGS273636CuGS283990 | 9486.9609 |  |
| CN1 | 2928243 | CCCTTA    | TTCTTT     | 11 | 9  | 7  | 0.429 | integrate  | CuGS273636CuGS283990 | 9486.9609 |  |
| CN1 | 2954881 | T         | TA         | 00 | 8  | 7  | 0.5   | integrate  | CuGS273636CuGS283990 | 9486.9609 |  |
| CN1 | 3482313 | A         | AT         | 11 | 4  | 9  | 0.307 | integrate  | CuGS273636CuGS283990 | 9486.9609 |  |
| CN1 | 3423975 | G         | GTGTT      | 11 | 4  | 9  | 0.429 | integrate  | CuGS273636CuGS283990 | 9486.9609 |  |
| CN1 | 3418446 | CA        | C          | 11 | 4  | 9  | 0.333 | downstream | CuGS273636CuGS283990 | 9486.9609 |  |
| CN1 | 3786241 | C         | C          | 11 | 1  | 9  | 0.333 | integrate  | CuGS273636CuGS283990 | 9486.9609 |  |
| CN1 | 433922  | CT        | C          | 11 | 6  | 7  | 0.43  | integrate  | CuGS273636CuGS283990 | 9486.9609 |  |
| CN1 | 424544  | A         | AG         | 00 | 11 | 7  | 0.722 | downstream | CuGS273636CuGS283990 | 9486.9609 |  |
| CN1 | 1142419 | C         | CT         | 00 | 10 | 9  | 0.577 | integrate  | CuGS273636CuGS283990 | 9486.9609 |  |
| CN1 | 1462854 | AT        | AT         | 00 | 9  | 6  | 0.426 | integrate  | CuGS273636CuGS283990 | 9486.9609 |  |
| CN1 | 1468551 | C         | CA         | 00 | 6  | 5  | 0.45  | integrate  | CuGS273636CuGS283990 | 9486.9609 |  |
| CN1 | 1477096 | G         | GT         | 00 | 12 | 6  | 0.333 | integrate  | CuGS273636CuGS283990 | 9486.9609 |  |
| CN1 | 186237  | C         | CA         | 00 | 9  | 6  | 0.4   | downstream | CuGS273636CuGS283990 | 9486.9609 |  |
| CN1 | 2877624 | GT        | G          | 11 | 9  | 6  | 0.4   | integrate  | CuGS273636CuGS283990 | 9486.9609 |  |
| CN1 | 2213848 | C         | CA         | 11 | 4  | 9  | 0.45  | integrate  | CuGS273636CuGS283990 | 9486.9609 |  |
| CN1 | 2213828 | AT        | G          | 11 | 5  | 9  | 0.45  | integrate  | CuGS273636CuGS283990 | 9486.9609 |  |
| CN1 | 272229  | C         | CA         | 00 | 11 | 7  | 0.322 | integrate  | CuGS273636CuGS283990 | 9486.9609 |  |
| CN1 | 276569  | CAT       | C          | 11 | 4  | 7  | 0.366 | integrate  | CuGS273636CuGS283990 | 9486.9609 |  |
| CN1 | 348551  | C         | CT         | 11 | 2  | 7  | 0.437 | downstream | CuGS273636CuGS283990 | 9486.9609 |  |
| CN1 | 362521  | G         | GA         | 11 | 5  | 7  | 0.437 | integrate  | CuGS273636CuGS283990 | 9486.9609 |  |
| CN1 | 482236  | G         | GT         | 11 | 4  | 7  | 0.366 | integrate  | CuGS273636CuGS283990 | 9486.9609 |  |
| CN1 | 482761  | AT        | AT         | 00 | 9  | 7  | 0.386 | integrate  | CuGS273636CuGS283990 | 9486.9609 |  |
| CN1 | 462364  | T         | TA         | 11 | 2  | 7  | 0.366 | integrate  | CuGS273636CuGS283990 | 9486.9609 |  |
| CN1 | 499926  | A         | AT         | 11 | 5  | 7  | 0.366 | integrate  | CuGS273636CuGS283990 | 9486.9609 |  |
| CN1 | 1522771 | AT        | A          | 00 | 11 | 5  | 0.437 | integrate  | CuGS273636CuGS283990 | 9486.9609 |  |
| CN1 | 1536879 | GA        | G          | 00 | 9  | 7  | 0.4   | integrate  | CuGS273636CuGS283990 | 9486.9609 |  |
| CN1 | 1565357 | CA        | C          | 00 | 10 | 6  | 0.37  | integrate  | CuGS273636CuGS283990 | 9486.9609 |  |
| CN1 | 2884487 | C         | CA         | 00 | 9  | 7  | 0.462 | integrate  | CuGS273636CuGS283990 | 9486.9609 |  |
| CN1 | 2125994 | G         | GT         | 00 | 8  | 7  | 0.467 | integrate  | CuGS273636CuGS283990 | 9486.9609 |  |
| CN1 | 2162221 | C         | CA         | 00 | 9  | 7  | 0.467 | integrate  | CuGS273636CuGS283990 | 9486.9609 |  |
| CN1 | 2266134 | CA        | C          | 11 | 2  | 10 | 0.333 | integrate  | CuGS273636CuGS283990 | 9486.9609 |  |
| CN1 | 2266222 | T         | T          | 11 | 9  | 10 | 0.366 | integrate  | CuGS273636CuGS283990 | 9486.9609 |  |
| CN1 | 2222144 | CT        | C          | 00 | 9  | 6  | 0.4   | integrate  | CuGS273636CuGS283990 | 9486.9609 |  |
| CN1 | 2222144 | CA        | C          | 00 | 9  | 6  | 0.338 | integrate  | CuGS273636CuGS283990 | 9486.9609 |  |
| CN1 | 2252974 | C         | CTTT       | 11 | 2  | 8  | 0.366 | integrate  | CuGS273636CuGS283990 | 9486.9609 |  |
| CN1 | 2284717 | IG        | IG         | 11 | 2  | 8  | 0.384 | integrate  | CuGS273636CuGS283990 | 9486.9609 |  |
| CN1 | 2286313 | GAAC      | G          | 11 | 6  | 5  | 0.453 | downstream | CuGS273636CuGS283990 | 9486.9609 |  |
| CN1 | 2626299 | AT        | A          | 11 | 1  | 9  | 0.333 | integrate  | CuGS273636CuGS283990 | 9486.9609 |  |
| CN1 | 2864273 | C         | CA         | 11 | 4  | 9  | 0.307 | integrate  | CuGS273636CuGS283990 | 9486.9609 |  |
| CN1 | 2733129 | GT        | G          | 11 | 4  | 9  | 0.307 | integrate  | CuGS273636CuGS283990 | 9486.9609 |  |
| CN1 | 44851   | AT        | A          | 11 | 4  | 9  | 0.333 | integrate  | CuGS273636CuGS283990 | 9486.9609 |  |
| CN1 | 27522   | CT        | C          | 11 | 1  | 9  | 0.787 | integrate  | CuGS273636CuGS283990 | 9486.9609 |  |
| CN1 | 46249   | G         | GA         | 11 | 11 | 9  | 0.389 | integrate  | CuGS273636CuGS283990 | 9486.9609 |  |
| CN1 | 465273  | TA        | TA         | 00 | 11 | 9  | 0.373 | integrate  | CuGS273636CuGS283990 | 9486.9609 |  |
| CN1 | 338667  | T         | TTTTT      | 11 | 9  | 5  | 0.429 | integrate  | CuGS273636CuGS283990 | 9486.9609 |  |
| CN1 | 338666  | AT        | A          | 11 | 11 | 9  | 0.434 | integrate  | CuGS273636CuGS283990 | 9486.9609 |  |
| CN1 | 338661  | T         | IG         | 11 | 11 | 2  | 0.462 | integrate  | CuGS273636CuGS283990 | 9486.9609 |  |
| CN1 | 338668  | GA        | GA         | 11 | 11 | 2  | 0.433 | integrate  | CuGS273636CuGS283990 | 9486.9609 |  |
| CN1 | 338118  | T         | TA         | 11 | 9  | 3  | 0.7   | integrate  | CuGS273636CuGS283990 | 9486.9609 |  |
| CN1 | 338162  | A         | AT         | 11 | 11 | 2  | 0.432 | integrate  | CuGS273636CuGS283990 | 9486.9609 |  |
| CN1 | 338660  | AT        | A          | 11 | 11 | 6  | 0.743 | integrate  | CuGS273636CuGS283990 | 9486.9609 |  |
| CN1 | 338664  | TA        | TA         | 11 | 11 | 1  | 0.433 | integrate  | CuGS273636CuGS283990 | 9486.9609 |  |
| CN1 | 338147  | A         | ATTT       | 11 | 11 | 1  | 0.437 | downstream | CuGS273636CuGS283990 | 9486.9609 |  |
| CN1 | 338666  | A         | A          | 11 | 11 | 1  | 0.782 | downstream | CuGS273636CuGS283990 | 9486.9609 |  |
| CN1 | 338668  | TTC       | T          | 11 | 8  | 4  | 0.467 | downstream | CuGS273636CuGS283990 | 9486.9609 |  |
| CN1 | 338666  | A         | AT         | 11 | 11 | 1  | 0.787 | integrate  | CuGS273636CuGS283990 | 9486.9609 |  |
| CN1 | 338667  | TTTATAT   | T          | 11 | 14 | 2  | 0.475 | integrate  | CuGS273636CuGS283990 | 9486.9609 |  |
| CN1 | 338666  | A         | AT         | 11 | 11 | 1  | 0.475 | integrate  | CuGS273636CuGS283990 | 9486.9609 |  |
| CN1 | 338668  | TTTATATAT | T          | 11 | 11 | 2  | 0.462 | integrate  | CuGS273636CuGS283990 | 9486.9609 |  |
| CN1 | 338666  | C         | CCACAGAG   | 11 | 11 | 1  | 0.467 | integrate  | CuGS273636CuGS283990 | 9486.9609 |  |
| CN1 | 338716  | T         | TA         | 11 | 21 | 5  | 0.424 | integrate  | CuGS273636CuGS283990 | 9486.9609 |  |
| CN1 | 338611  | CT        | C          | 11 | 11 | 2  | 0.467 | integrate  | CuGS273636CuGS283990 | 9486.9609 |  |
| CN1 | 338615  | A         | AAATAC     | 11 | 11 | 6  | 0.462 | integrate  | CuGS273636CuGS283990 | 9486.9609 |  |
| CN1 | 338668  | AT        | ATT        | 11 | 11 | 6  | 0.432 | integrate  | CuGS273636CuGS283990 | 9486.9609 |  |
| CN1 | 338621  | TAATACCA  | T          | 11 | 14 | 6  | 0.7   | integrate  | CuGS273636CuGS283990 | 9486.9609 |  |
| CN1 | 338664  | AT        | A          | 11 | 11 | 6  | 0.462 | integrate  | CuGS273636CuGS283990 | 9486.9609 |  |
| CN1 | 338707  | CA        | C          | 11 | 12 | 2  | 0.471 | integrate  | CuGS273636CuGS283990 | 9486.9609 |  |
| CN1 | 338760  | CA        | CA         | 11 | 11 | 1  | 0.7   | integrate  | CuGS273636CuGS283990 | 9486.9609 |  |
| CN1 | 338798  | A         | AAAT       | 11 | 12 | 2  | 0.721 | integrate  | CuGS273636CuGS283990 | 9486.9609 |  |
| CN1 | 338666  | G         | GA         | 11 | 11 | 1  | 0.743 | integrate  | CuGS273636CuGS283990 | 9486.9609 |  |
| CN1 | 338663  | C         | CAT        | 11 | 12 | 4  | 0.464 | integrate  | CuGS273636CuGS283990 | 9486.9609 |  |
| CN1 | 338662  | A         | AA         | 11 | 11 | 4  | 0.743 | integrate  | CuGS273636CuGS283990 | 9486.9609 |  |
| CN1 | 338653  | TA        | T          | 11 | 14 | 8  | 0.437 | integrate  | CuGS273636CuGS283990 | 9486.9609 |  |
| CN1 | 338765  | T         | T          | 11 | 11 | 1  | 0.434 | integrate  | CuGS273636CuGS283990 | 9486.9609 |  |
| CN1 | 338775  | G         | GATTT      | 11 | 10 | 4  | 0.743 | integrate  | CuGS273636CuGS283990 | 9486.9609 |  |
| CN1 | 338671  | A         | ACTTCT     | 11 | 11 | 1  | 0.434 | integrate  | CuGS273636CuGS283990 | 9486.9609 |  |
| CN1 | 338651  | AT        | A          | 11 | 7  | 5  | 0.453 | integrate  | CuGS273636CuGS283990 | 9486.9609 |  |
| CN1 | 338679  | AT        | AT         | 11 | 11 | 1  | 0.434 | integrate  | CuGS273636CuGS283990 | 9486.9609 |  |
| CN1 | 338166  | G         | GGA        | 11 | 10 | 4  | 0.743 | integrate  | CuGS273636CuGS283990 | 9486.9609 |  |
| CN1 | 338625  | C         | CACA       | 11 | 11 | 1  | 0.462 | integrate  | CuGS273636CuGS283990 | 9486.9609 |  |
| CN1 | 338664  | CTGTCG    | C          | 11 | 9  | 3  | 0.7   | integrate  | CuGS273636CuGS283990 | 9486.9609 |  |
| CN1 | 338665  | TA        | TA         | 11 | 11 | 1  | 0.433 | integrate  | CuGS273636CuGS283990 | 9486.9609 |  |
| CN1 | 338714  | TATA      | T          | 11 | 12 | 1  | 0.436 | integrate  | CuGS273636CuGS283990 | 9486.9609 |  |
| CN1 | 338661  | CT        | C          | 11 | 11 | 1  | 0.782 | integrate  | CuGS273636CuGS283990 | 9486.9609 |  |
| CN1 | 338663  | AG        | A          | 11 | 11 | 6  | 0.462 | integrate  | CuGS273636CuGS283990 | 9486.9609 |  |
| CN1 | 338717  | TA        | T          | 11 | 11 | 1  | 0.469 | integrate  | CuGS273636CuGS283990 | 9486.9609 |  |
| CN1 | 338708  | TC        | T          | 11 | 11 | 4  | 0.747 | integrate  | CuGS273636CuGS283990 | 9486.9609 |  |
| CN1 | 338660  | T         | TA         | 11 | 11 | 1  | 0.743 | integrate  | CuGS273636CuGS283990 | 9486.9609 |  |
| CN1 | 338697  | CAT       | TA         | 11 | 11 | 19 | 0.444 | integrate  | CuGS273636CuGS283990 | 9486.9609 |  |
| CN1 | 338662  | C         | C          | 11 | 11 | 1  | 0.722 | integrate  | CuGS273636CuGS283990 | 9486.9609 |  |
| CN1 | 338650  | GAGAGAC   | G          | 11 | 12 | 2  | 0.471 | integrate  | CuGS273636CuGS283990 | 9486.9609 |  |
| CN1 | 338656  | A         | ATATCTCCCA | 11 | 11 | 2  | 0.464 | integrate  | CuGS273636CuGS283990 | 9486.9609 |  |
| CN1 | 338713  | G         | GTTT       | 11 | 11 | 2  | 0.787 | integrate  | CuGS273636CuGS283990 | 9486.9609 |  |
| CN1 | 338669  | C         | CTCT       | 11 | 11 | 1  | 0.733 | integrate  | CuGS273636CuGS283990 | 9486.9609 |  |
| CN1 | 338612  | A         | AT         | 11 | 11 | 2  | 0.462 | downstream | CuGS273636CuGS283990 | 9486.9609 |  |
| CN1 | 338662  | A         | A          | 11 | 11 | 2  | 0.462 | downstream | CuGS273636CuGS283990 | 9486.9609 |  |
| CN1 | 338691  | GC        | G          | 11 | 11 | 2  | 0.467 | downstream | CuGS273636CuGS283990 | 9486.9609 |  |
| CN1 | 338656  | TA        | TA         | 11 | 11 | 1  | 0.7   | downstream | CuGS273636CuGS283990 | 9486.9609 |  |
| CN1 | 448642  | TATA      | C          | 11 | 11 | 4  | 0.464 | integrate  | CuGS273636CuGS283990 | 9486.9609 |  |
| CN1 | 448717  | ACAT      | A          | 11 | 11 | 2  | 0.467 | integrate  | CuGS273636CuGS283990 | 9486.9609 |  |
| CN1 | 448913  | C         | CAAT       | 11 | 11 | 2  | 0.432 | integrate  | CuGS273636CuGS283990 | 9486.9609 |  |
| CN1 | 448913  | G         | GA         | 11 | 11 | 2  | 0.432 | integrate  | CuGS273636CuGS283990 | 9486.9609 |  |
| CN1 | 448104  | CA        | C          | 11 | 10 | 6  | 0.743 | integrate  | CuGS273636CuGS283990 | 9486.9609 |  |
| CN1 | 448124  | C         | CTTTGAT    | 11 |    |    |       |            |                      |           |  |

[illegible]

**Supplemental Table 4.** Genotyping analysis of SNP 18277305 and SNP 23376757 using KASP technology

| F <sub>2</sub><br>population | Phenotype   | Genotype-SNP<br>18277305 | Genotype-SNP<br>23376757 | F <sub>2</sub><br>population | Phenotype       | Genotype-SNP<br>18277305 | Genotype-S<br>NP23376757 |
|------------------------------|-------------|--------------------------|--------------------------|------------------------------|-----------------|--------------------------|--------------------------|
| F <sub>2</sub> -1            | normal leaf | T:C                      | A:A                      | F <sub>2</sub> -24           | normal leaf     | C:C                      | A:G                      |
| F <sub>2</sub> -2            | normal leaf | T:C                      | A:G                      | F <sub>2</sub> -25           | normal leaf     | T:C                      | A:G                      |
| F <sub>2</sub> -3            | normal leaf | C:C                      | A:G                      | F <sub>2</sub> -26           | normal leaf     | T:C                      | A:G                      |
| F <sub>2</sub> -4            | normal leaf | T:C                      | A:G                      | F <sub>2</sub> -27           | normal leaf     | T:C                      | A:G                      |
| F <sub>2</sub> -5            | normal leaf | C:C                      | G:G                      | F <sub>2</sub> -28           | normal leaf     | C:C                      | G:G                      |
| F <sub>2</sub> -6            | normal leaf | C:C                      | A:G                      | F <sub>2</sub> -29           | normal leaf     | C:C                      | A:G                      |
| F <sub>2</sub> -7            | normal leaf | T:C                      | A:G                      | F <sub>2</sub> -30           | normal leaf     | C:C                      | A:G                      |
| F <sub>2</sub> -8            | normal leaf | T:C                      | A:G                      | F <sub>2</sub> -31           | variegated leaf | T:T                      | A:A                      |
| F <sub>2</sub> -9            | normal leaf | C:C                      | G:G                      | F <sub>2</sub> -32           | variegated leaf | T:T                      | A:A                      |
| F <sub>2</sub> -10           | normal leaf | T:C                      | A:A                      | F <sub>2</sub> -33           | variegated leaf | T:T                      | A:A                      |
| F <sub>2</sub> -11           | normal leaf | T:C                      | G:G                      | F <sub>2</sub> -34           | variegated leaf | T:T                      | A:A                      |
| F <sub>2</sub> -12           | normal leaf | T:C                      | A:G                      | F <sub>2</sub> -35           | variegated leaf | T:T                      | A:G                      |
| F <sub>2</sub> -13           | normal leaf | T:C                      | A:G                      | F <sub>2</sub> -36           | variegated leaf | T:T                      | A:A                      |
| F <sub>2</sub> -14           | normal leaf | T:C                      | A:A                      | F <sub>2</sub> -37           | variegated leaf | T:T                      | A:A                      |
| F <sub>2</sub> -15           | normal leaf | C:C                      | A:A                      | F <sub>2</sub> -38           | variegated leaf | T:T                      | A:G                      |
| F <sub>2</sub> -16           | normal leaf | C:C                      | A:A                      | F <sub>2</sub> -39           | variegated leaf | T:T                      | A:A                      |
| F <sub>2</sub> -17           | normal leaf | C:C                      | A:G                      | F <sub>2</sub> -40           | variegated leaf | T:T                      | A:A                      |
| F <sub>2</sub> -18           | normal leaf | T:C                      | A:G                      | F <sub>2</sub> -41           | variegated leaf | T:T                      | A:A                      |
| F <sub>2</sub> -19           | normal leaf | T:C                      | A:G                      | F <sub>2</sub> -42           | variegated leaf | T:T                      | A:A                      |
| F <sub>2</sub> -20           | normal leaf | T:C                      | A:G                      | F <sub>2</sub> -43           | variegated leaf | T:T                      | A:G                      |
| F <sub>2</sub> -21           | normal leaf | T:C                      | A:G                      | F <sub>2</sub> -44           | variegated leaf | T:T                      | A:G                      |
| F <sub>2</sub> -22           | normal leaf | C:C                      | A:G                      | F <sub>2</sub> -45           | variegated leaf | T:T                      | A:A                      |
| F <sub>2</sub> -23           | normal leaf | C:C                      | A:G                      | F <sub>2</sub> -46           | variegated leaf | T:T                      | A:G                      |

**Supplemental Table 5.** List of differentially expressed genes identified from the transcriptome profile analysis of variegated leaf mutant in cucumber

| Gene ID      | log2FoldChange | P value    | Regulation | Arabidopsis<br>homologue | Description                                                                                                                       |
|--------------|----------------|------------|------------|--------------------------|-----------------------------------------------------------------------------------------------------------------------------------|
| Novel2123    | Inf            | 7.78E-18   | Ups        |                          |                                                                                                                                   |
| Csa2G070310  | 6.396604781    | 3.32E-25   | Ups        | AT3G12580                | HSP70 (heat shock protein 70); ATP binding                                                                                        |
| Csa5G198120  | 5.672425342    | 7.27E-07   | Ups        | AT1G53540                | 17.6 kDa class I small heat shock protein                                                                                         |
| Csa3G180260  | 4.473931188    | 3.88E-21   | Ups        | AT4G25490                | CBF1 (C-repeat/dre binding factor 1); DNA binding / transcription activator/ transcription factor                                 |
| Csa3G020090  | 3.906890596    | 4.61E-05   | Ups        | AT4G25200                | ATHSP23.6-MITO (mitochondrion-localized small heat shock protein 23.6)                                                            |
| Csa7G312930  | 3.874469118    | 5.75E-05   | Ups        | AT4G24280                | cpHsc70-1 (chloroplast heat shock protein 70-1); ATP binding                                                                      |
| Csa3G020080  | 3.826851098    | 3.62E-41   | Ups        | AT4G25200                | ATHSP23.6-MITO (mitochondrion-localized small heat shock protein 23.6)                                                            |
| Csa3G183950  | 3.672860478    | 2.86E-25   | Ups        | AT5G52640                | ATHSP90.1 (heat shock protein 90.1); ATP binding / unfolded protein binding                                                       |
| Csa1G597730  | 3.545968369    | 1.26E-13   | Ups        | AT1G74930                | ORA47; DNA binding / transcription factor                                                                                         |
| Csa7G072770  | 3.527247003    | 1.10E-10   | Ups        | AT4G10250                | ATHSP22.0                                                                                                                         |
| Csa5G514500  | 3.520341653    | 8.86E-33   | Ups        | AT3G12580                | HSP70 (heat shock protein 70); ATP binding                                                                                        |
| Csa6G513610  | 3.426264755    | 0.00019018 | Ups        | AT4G22030                | F-box family protein                                                                                                              |
| Csa6G519700  | 3.426264755    | 0.00019018 | Ups        | AT2G42760                | unknown protein                                                                                                                   |
| Csa5G174570  | 3.386058432    | 3.14E-11   | Ups        | AT5G51990                | CBF4 (C-repeat/ binding factor 4); DNA binding / transcription activator/ transcription factor                                    |
| Csa1G589710  | 3.310733509    | 2.89E-31   | Ups        | AT5G12010                | unknown protein                                                                                                                   |
| CsaUNG012430 | 3.282035368    | 5.56E-07   | Ups        |                          |                                                                                                                                   |
| Csa1G527870  | 3.209453366    | 9.07E-24   | Ups        | AT5G59720                | HSP18.2 (heat shock protein 18.2)                                                                                                 |
| Csa5G515060  | 3.141355849    | 4.73E-08   | Ups        |                          | No hits found                                                                                                                     |
| Csa4G296260  | 3.140481224    | 1.25E-15   | Ups        | AT5G51670                | unknown protein                                                                                                                   |
| Csa3G207390  | 3.129283017    | 2.79E-12   | Ups        | AT4G34410                | RRTF1 (redox responsive transcription factor 1); DNA binding / transcription factor                                               |
| Csa4G049610  | 3.079727192    | 4.60E-06   | Ups        | AT4G11280                | ACS6 (1-aminocyclopropane-1-carboxylic acid (ACC) synthase 6);<br>1-aminocyclopropane-1-carboxylate synthase                      |
| Csa6G423400  | 3.04026387     | 3.59E-14   | Ups        | AT3G23730                | xyloglucan:xyloglucosyl transferase, putative / xyloglucan endotransglycosylase, putative / endo-xyloglucan transferase, putative |
| Csa1G422990  | 2.972741793    | 4.61E-24   | Ups        | AT4G25810                | XTR6 (xyloglucan endotransglucosylase 6); hydrolase, acting on glycosyl bonds /                                                   |

| Gene ID     | log2FoldChange | P value         | Regulation | Arabidopsis<br>homologue | Description                                                                                                                                            |
|-------------|----------------|-----------------|------------|--------------------------|--------------------------------------------------------------------------------------------------------------------------------------------------------|
|             |                |                 |            |                          | hydrolase, hydrolyzing O-glycosyl<br>compounds / xyloglucan:xyloglucosyl<br>transferase                                                                |
| Csa1G039100 | 2.947977788    | 8.22E-20        | Ups        | AT1G74310                | ATHSP101 (Arabidopsis thaliana heat shock<br>protein 101); ATP binding / ATPase/<br>nucleoside-triphosphatase/ nucleotide<br>binding / protein binding |
| Csa7G073700 | 2.944858446    | 2.99E-05        | Ups        | AT4G34410                | RRTF1 (redox responsive transcription<br>factor 1); DNA binding / transcription factor                                                                 |
| Csa6G303740 | 2.887525271    | 4.82E-05        | Ups        | AT2G28710                | zinc finger (C2H2 type) family protein                                                                                                                 |
| Csa2G416770 | 2.874469118    | 8.58E-07        | Ups        | AT2G32510                | MAPKKK17; ATP binding / kinase/ protein<br>kinase/ protein serine/threonine kinase                                                                     |
| Csa5G155570 | 2.862496476    | 3.36E-05        | Ups        | AT1G12610                | DDF1 (dwarf and delayed flowering 1);<br>DNA binding / sequence-specific DNA<br>binding / transcription factor                                         |
| Csa5G155560 | 2.857980995    | 0.00020498<br>7 | Ups        |                          | No hits found                                                                                                                                          |
| Csa7G048060 | 2.824428435    | 2.74E-05        | Ups        | AT4G32480                | unknown protein                                                                                                                                        |
| Csa3G710870 | 2.693939454    | 9.25E-23        | Ups        | AT1G80840                | WRKY40; transcription factor                                                                                                                           |
| Csa1G002110 | 2.68182404     | 9.08E-05        | Ups        | AT1G76650                | calcium-binding EF hand family protein                                                                                                                 |
| Csa7G073520 | 2.62935662     | 2.73E-05        | Ups        | AT4G34120                | LEJ1 (Loss of the timing of ET and JA<br>biosynthesis1)                                                                                                |
| Csa3G782630 | 2.613817363    | 1.10E-07        | Ups        | AT2G35930                | PUB23 (plant U-BOX 23); ubiquitin-protein<br>ligase                                                                                                    |
| Csa3G017320 | 2.565485126    | 2.55E-12        | Ups        | AT4G17500                | ATERF-1 (ethylene responsive element<br>binding factor 1); DNA binding /<br>transcription activator/ transcription factor                              |
| Csa6G516960 | 2.48644676     | 7.90E-17        | Ups        | AT1G61340                | F-box family protein                                                                                                                                   |
| Csa3G889770 | 2.461447964    | 1.07E-09        | Ups        | AT1G35140                | PHI-1 (phosphate-induced 1)                                                                                                                            |
| Csa6G495100 | 2.421956913    | 3.93E-07        | Ups        | AT5G67480                | BT4 (BTB andTAZ domain protein 4);<br>protein binding / transcription regulator                                                                        |
| Csa5G571440 | 2.399930607    | 0.00010871<br>5 | Ups        | AT5G17350                | unknown protein                                                                                                                                        |
| Csa1G168920 | 2.368686193    | 3.70E-14        | Ups        | AT5G22250                | CCR4-NOT transcription complex protein,<br>putative                                                                                                    |
| Csa4G665120 | 2.357010554    | 8.00E-09        | Ups        | AT1G21010                | unknown protein                                                                                                                                        |
| Csa7G237300 | 2.321928095    | 4.52E-06        | Ups        | AT3G22240                | unknown protein                                                                                                                                        |
| Csa2G005340 | 2.300394933    | 2.75E-05        | Ups        | AT4G13395                | RTFL12                                                                                                                                                 |
| Csa7G407620 | 2.289506617    | 0.00026986      | Ups        | AT3G03280                | unknown protein                                                                                                                                        |

| Gene ID     | log2FoldChange | P value  | Regulation | Arabidopsis<br>homologue | Description                                                                                                                                                       |
|-------------|----------------|----------|------------|--------------------------|-------------------------------------------------------------------------------------------------------------------------------------------------------------------|
| 4           |                |          |            |                          |                                                                                                                                                                   |
| Csa5G190530 | 2.247927513    | 1.64E-05 | Ups        | AT1G53540                | 17.6 kDa class I small heat shock protein                                                                                                                         |
| Csa5G155500 | 2.221623189    | 4.73E-11 | Ups        | AT5G07250                | ATRBL3 (Arabidopsis rhomboid-like protein 3)                                                                                                                      |
| Csa1G435790 | 2.185866545    | 2.35E-08 | Ups        |                          | No hits found                                                                                                                                                     |
| Csa1G537320 | 2.169925001    | 2.47E-06 | Ups        | AT1G30370                | lipase class 3 family protein                                                                                                                                     |
| Csa3G150000 | 2.15704371     | 2.16E-06 | Ups        | AT1G03220                | extracellular dermal glycoprotein, putative / EDGP, putative                                                                                                      |
| Csa3G119700 | 2.145027058    | 1.49E-16 | Ups        | AT4G23810                | WRKY53; DNA binding / protein binding / transcription activator/ transcription factor                                                                             |
| Csa2G354820 | 2.143302478    | 5.70E-08 | Ups        | AT1G27730                | STZ (salt tolerance zinc finger); nucleic acid binding / transcription factor/ transcription repressor/ zinc ion binding                                          |
| Csa2G264570 | 2.077775155    | 1.15E-10 | Ups        | AT4G36040                | DNAJ heat shock N-terminal domain-containing protein (J11)                                                                                                        |
| Csa4G056600 | 2.074887212    | 4.65E-11 | Ups        | AT4G19230                | CYP707A1; (+)-abscisic acid 8'-hydroxylase/ oxygen binding                                                                                                        |
| Novel1163   | 2.047420905    | 3.29E-11 | Ups        |                          |                                                                                                                                                                   |
| Csa6G006890 | 2.031855812    | 2.90E-16 | Ups        | AT2G46240                | BAG6 (BCL-2-associated athanogene 6); calmodulin binding / protein binding                                                                                        |
| Csa5G608380 | 2.000862598    | 1.05E-13 | Ups        | AT1G68840                | RAV2 (Regulator of the ATPase of the vacuolar membrane); DNA binding / transcription factor/ transcription repressor                                              |
| Csa5G547610 | 1.992413506    | 4.38E-09 | Ups        | AT2G01670                | atnudt17 (Arabidopsis thaliana Nudix hydrolase homolog 17); hydrolase                                                                                             |
| Csa5G167120 | 1.962686842    | 6.30E-11 | Ups        | AT5G61600                | ethylene-responsive element-binding family protein                                                                                                                |
| Csa2G382470 | 1.961752531    | 6.03E-07 | Ups        |                          | No hits found                                                                                                                                                     |
| Csa2G007990 | 1.958961616    | 4.70E-12 | Ups        | AT2G43290                | MSS3 (multicopy suppressors of snf4 deficiency in yeast 3); calcium ion binding                                                                                   |
| Csa3G779010 | 1.949780645    | 1.40E-11 | Ups        | AT2G35980                | YLS9 (Yellow-leaf-specific gene 9)                                                                                                                                |
| Csa3G018320 | 1.942918905    | 1.31E-05 | Ups        | AT4G17490                | ATERF6 (Ethylene responsive element binding factor 6); DNA binding / transcription factor                                                                         |
| Csa1G422470 | 1.909802191    | 4.76E-07 | Ups        | AT4G25810                | XTR6 (Xyloglucan endotransglucosylase 6); hydrolase, acting on glycosyl bonds / hydrolase, hydrolyzing O-glycosyl compounds / xyloglucan:xyloglucosyl transferase |

| Gene ID      | log2FoldChange P value |                 | Regulation | Arabidopsis<br>homologue | Description                                                                                                                                             |
|--------------|------------------------|-----------------|------------|--------------------------|---------------------------------------------------------------------------------------------------------------------------------------------------------|
| Csa6G425790  | 1.904139985            | 6.37E-06        | Ups        | AT3G44260                | CCR4-NOT transcription complex protein,<br>putative                                                                                                     |
| Csa5G197120  | 1.896254281            | 7.31E-14        | Ups        |                          | No hits found                                                                                                                                           |
| Csa7G049230  | 1.872495527            | 9.06E-08        | Ups        | AT3G15210                | AT3G15210.1 ERF4 (Ethylene responsive<br>element binding factor 4); DNA binding /<br>protein binding / transcription factor/<br>transcription repressor |
| Csa3G816710  | 1.843274496            | 4.06E-09        | Ups        | AT3G56880                | VQ motif-containing protein                                                                                                                             |
| Csa3G172920  | 1.837783094            | 1.21E-13        | Ups        | AT3G15210                | ERF4 (Ethylene responsive element binding<br>factor 4); DNA binding / protein binding /<br>transcription factor/ transcription repressor                |
| Csa5G591720  | 1.835337335            | 3.85E-12        | Ups        | AT4G27670                | HSP21 (Heat shock protein 21)                                                                                                                           |
| Novel2091    | 1.812139985            | 0.00029256<br>1 | Ups        |                          |                                                                                                                                                         |
| Csa5G190560  | 1.805415381            | 2.33E-10        | Ups        | AT3G46230                | ATHSP17.4                                                                                                                                               |
| Csa7G387720  | 1.693572999            | 5.56E-07        | Ups        | AT3G22830                | AT-HSFA6B; DNA binding / transcription<br>factor                                                                                                        |
| Csa4G652740  | 1.667424661            | 1.60E-05        | Ups        | AT5G35090                | AT5G35090.1 unknown protein                                                                                                                             |
| Csa4G011820  | 1.666646298            | 1.53E-05        | Ups        | AT1G12060                | ATBAG5 (Arabidopsis thaliana<br>BCL-2-associated athanogene 5); protein<br>binding                                                                      |
| Csa2G409500  | 1.643261141            | 4.09E-07        | Ups        |                          | No hits found                                                                                                                                           |
| Csa6G363530  | 1.630912087            | 2.50E-05        | Ups        |                          | No hits found                                                                                                                                           |
| Csa7G041870  | 1.616395009            | 2.13E-07        | Ups        | AT5G47530                | auxin-responsive protein, putative                                                                                                                      |
| CsaUNG031640 | 1.572914873            | 4.61E-09        | Ups        |                          |                                                                                                                                                         |
| Csa3G164500  | 1.560714954            | 7.34E-05        | Ups        | AT3G16720                | ATL2; protein binding / zinc ion binding                                                                                                                |
| Csa6G518040  | 1.528495549            | 1.14E-08        | Ups        | AT3G15210                | ERF4 (Ethylene responsive element binding<br>factor 4); DNA binding / protein binding /<br>transcription factor/ transcription repressor                |
| Csa2G369020  | 1.510716166            | 3.90E-10        | Ups        | AT1G35140                | PHI-1 (Phosphate-induced 1)                                                                                                                             |
| Csa6G520420  | 1.509589765            | 3.36E-06        | Ups        | AT1G29670                | GDSL-motif lipase/hydrolase family protein                                                                                                              |
| Csa3G319280  | 1.49789566             | 5.41E-09        | Ups        | AT1G66400                | calmodulin-related protein, putative                                                                                                                    |
| Csa4G642460  | 1.497499659            | 0.00014530<br>3 | Ups        | AT1G27730                | STZ (salt tolerance zinc finger); nucleic acid<br>binding / transcription factor/ transcription<br>repressor/ zinc ion binding                          |
| Csa6G010030  | 1.490912366            | 1.21E-07        | Ups        | AT2G40000                | HSPRO2                                                                                                                                                  |
| Csa3G730800  | 1.477799006            | 2.95E-05        | Ups        | AT2G38470                | WRKY33; transcription factor                                                                                                                            |
| Csa4G638510  | 1.477159211            | 7.12E-05        | Ups        | AT2G23290                | AtMYB70 (myb domain protein 70); DNA<br>binding / transcription factor                                                                                  |
| Csa6G358130  | 1.46453249             | 3.02E-05        | Ups        | AT1G76240                | unknown protein                                                                                                                                         |

| Gene ID     | log2FoldChange | P value     | Regulation | Arabidopsis<br>homologue | Description                                                                                                                                                       |
|-------------|----------------|-------------|------------|--------------------------|-------------------------------------------------------------------------------------------------------------------------------------------------------------------|
| Csa6G490870 | 1.457279948    | 0.000103468 | Ups        | AT4G36990                | HSF4 (Heat shock factor 4); DNA binding / transcription factor/ transcription repressor                                                                           |
| Csa4G214830 | 1.448758117    | 1.92E-08    | Ups        | AT2G41430                | ERD15 (Early responsive to dehydration 15); protein binding                                                                                                       |
| Csa6G405920 | 1.446429339    | 8.79E-09    | Ups        | AT1G08010                | zinc finger (GATA type) family protein                                                                                                                            |
| Csa2G030090 | 1.40676604     | 2.57E-08    | Ups        | AT1G09070                | SRC2 (Soybean gene regulated by COLD-2); protein binding                                                                                                          |
| Csa6G008740 | 1.401813804    | 0.000123844 | Ups        | AT5G02070                | protein kinase-related                                                                                                                                            |
| Csa4G051470 | 1.390789953    | 0.000152103 | Ups        | AT4G11070                | WRKY41; transcription factor                                                                                                                                      |
| Csa7G071520 | 1.385431037    | 7.64E-05    | Ups        | AT4G33920                | protein phosphatase 2C family protein / PP2C family protein                                                                                                       |
| Csa6G361410 | 1.38466385     | 0.000420119 | Ups        | AT5G21940                | unknown protein                                                                                                                                                   |
| Csa1G268280 | 1.374881693    | 2.18E-07    | Ups        | AT5G58070                | TIL (Temperature-induced lipocalin); binding / transporter                                                                                                        |
| Csa2G408940 | 1.374542721    | 0.000159479 | Ups        | AT2G20562                | unknown protein                                                                                                                                                   |
| Csa7G298820 | 1.362274838    | 3.03E-07    | Ups        | AT1G74450                | unknown protein                                                                                                                                                   |
| Csa5G207940 | 1.360208928    | 2.30E-08    | Ups        | AT3G55980                | SZF1 (Salt-inducible zinc finger 1); transcription factor                                                                                                         |
| Csa6G423390 | 1.354673877    | 4.27E-08    | Ups        | AT4G14130                | XTR7 (xyloglucan endotransglucosylase 7); hydrolase, acting on glycosyl bonds / hydrolase, hydrolyzing O-glycosyl compounds / xyloglucan:xyloglucosyl transferase |
| Csa5G471600 | 1.329278703    | 7.91E-07    | Ups        | AT2G03260                | EXS family protein / ERD1/XPR1/SYG1 family protein                                                                                                                |
| Csa1G479630 | 1.314146931    | 2.76E-06    | Ups        | AT3G45640                | ATMPK3 (Arabidopsis thaliana mitogen-activated protein kinase 3); MAP kinase/ kinase/ protein binding / protein kinase                                            |
| Csa6G403600 | 1.281850656    | 2.20E-05    | Ups        | AT1G59710                |                                                                                                                                                                   |
| Csa6G152950 | 1.281339296    | 9.84E-07    | Ups        | AT2G27580                | zinc finger (AN1-like) family protein                                                                                                                             |
| Csa6G499220 | 1.249556021    | 0.0001012   | Ups        | AT1G72220                | zinc finger (C3HC4-type RING finger) family protein                                                                                                               |
| Csa4G630010 | 1.247927513    | 8.05E-05    | Ups        | AT3G15210                | ERF4 (Ethylene responsive element binding factor 4); DNA binding / protein binding / transcription factor/ transcription repressor                                |

| Gene ID     | log2FoldChange | P value         | Regulation | Arabidopsis<br>homologue | Description                                                                                                                                              |
|-------------|----------------|-----------------|------------|--------------------------|----------------------------------------------------------------------------------------------------------------------------------------------------------|
| Csa1G614640 | 1.218894977    | 2.27E-06        | Ups        |                          | No hits found                                                                                                                                            |
| Csa5G603940 | 1.209237925    | 2.97E-05        | Ups        | AT1G24170                | LGT9; polygalacturonate<br>4-alpha-galacturonosyltransferase/<br>transferase, transferring glycosyl groups /<br>transferase, transferring hexosyl groups |
| Csa7G449420 | 1.208834316    | 1.12E-06        | Ups        | AT1G72520                | lipoxygenase, putative                                                                                                                                   |
| Csa1G025960 | 1.206780222    | 7.21E-05        | Ups        | AT2G38470                | WRKY33; transcription factor                                                                                                                             |
| Csa3G782680 | 1.183052435    | 1.02E-05        | Ups        | AT3G11820                | SYP121 (Syntaxin of plants 121); SNAP<br>receptor/ protein anchor                                                                                        |
| Csa3G181940 | 1.175154058    | 9.72E-05        | Ups        | AT5G62020                | AT-HSFB2A; DNA binding / transcription<br>factor                                                                                                         |
| Csa5G512930 | 1.144774476    | 6.13E-06        | Ups        | AT5G02500                | HSC70-1 (Heat shock protein cognate 70-1);<br>ATP binding                                                                                                |
| Csa6G118880 | 1.129739253    | 0.00030707      | Ups        | AT5G42340                | binding / ubiquitin-protein ligase                                                                                                                       |
| Csa6G363520 | 1.123988717    | 6.45E-05        | Ups        |                          | No hits found                                                                                                                                            |
| Csa5G149880 | 1.113856212    | 0.00034605<br>7 | Ups        | AT4G24040                | TRE1 (Trehalase 1); alpha,alpha-trehalase/<br>trehalase                                                                                                  |
| Csa2G237750 | 1.105990696    | 7.58E-05        | Ups        | AT2G23460                | XLG1 (Extra-large G-Protein 1); guanyl<br>nucleotide binding / signal transducer                                                                         |
| Csa1G527860 | 1.100424306    | 4.54E-05        | Ups        | AT3G46230                | ATHSP17.4                                                                                                                                                |
| Csa6G507370 | 1.098273749    | 0.00029951<br>5 | Ups        | AT4G35770                | SEN1 (SenescenceENESCENCE 1)                                                                                                                             |
| Csa5G181480 | 1.073777926    | 9.72E-05        | Ups        | AT3G55430                | glycosyl hydrolase family 17 protein /<br>beta-1,3-glucanase, putative                                                                                   |
| Csa3G175690 | 1.067744607    | 1.70E-05        | Ups        | AT4G12430                | trehalose-6-phosphate phosphatase, putative                                                                                                              |
| Csa3G710780 | 1.065687903    | 0.00011268<br>1 | Ups        | AT1G80920                | J8; heat shock protein binding / unfolded<br>protein binding                                                                                             |
| Novel784    | 1.062971856    | 5.13E-05        | Ups        |                          |                                                                                                                                                          |
| Csa3G405510 | 1.062541466    | 0.00043712      | Ups        | AT5G48150                | PAT1 (phytochrome a signal transduction 1);<br>signal transducer/ transcription factor                                                                   |
| Csa3G119500 | 1.049710173    | 2.02E-05        | Ups        | AT1G01260                | basic helix-loop-helix (bHLH) family protein                                                                                                             |
| Csa6G072990 | 1.04026387     | 5.51E-05        | Ups        | AT5G18670                | BMV3; beta-amylase/ catalytic/ cation<br>binding                                                                                                         |
| Csa1G642540 | 1.039528364    | 1.24E-05        | Ups        | AT3G44110                | ATJ3; protein binding                                                                                                                                    |
| Csa4G025120 | -1.026417334   | 2.21E-05        | Down       | AT5G61660                | glycine-rich protein                                                                                                                                     |
| Csa4G436980 | -1.071553261   | 0.00016597      | Down       | AT3G57040                | ARR9 (Response regulator 9); transcription<br>regulator/ two-component response regulator                                                                |
| Csa5G202370 | -1.079814341   | 3.05E-05        | Down       | AT2G40080                | ELF4 (Early flowering 4)                                                                                                                                 |
| Csa3G598910 | -1.096945556   | 8.77E-05        | Down       | AT3G26740                | CCL (CCR-LIKE)                                                                                                                                           |

| Gene ID      | log2FoldChange | P value         | Regulation | Arabidopsis<br>homologue | Description                                                                                                                                         |
|--------------|----------------|-----------------|------------|--------------------------|-----------------------------------------------------------------------------------------------------------------------------------------------------|
| Csa6G519450  | -1.102128409   | 3.36E-05        | Down       | AT1G28570                | GDSL-motif lipase, putative                                                                                                                         |
| Csa3G778270  | -1.102538162   | 7.90E-05        | Down       | AT1G52340                | ABA2 (ABA DEFICIENT 2); alcohol<br>dehydrogenase/ oxidoreductase/ xanthoxin<br>dehydrogenase                                                        |
| CsaUNG021710 | -1.117997209   | 0.00039240<br>1 | Down       |                          | AtGolS2 (Arabidopsis thaliana galactinol<br>synthase 2); transferase, transferring glycosyl<br>groups / transferase, transferring hexosyl<br>groups |
| Csa6G000080  | -1.168765745   | 3.47E-05        | Down       | AT1G56600                | AHA5 (Arabidopsis H(+)-ATPase 5);<br>ATPase                                                                                                         |
| Csa1G423270  | -1.180425414   | 0.00011143<br>2 | Down       | AT2G24520                | protease inhibitor/seed storage/lipid transfer<br>protein (LTP) family protein                                                                      |
| Csa4G146240  | -1.19985546    | 3.59E-07        | Down       | AT1G48750                | acid phosphatase class B family protein                                                                                                             |
| Novel122     | -1.252936297   | 0.00010717      | Down       |                          | TPS21 (TERPENE SYNTHASE 21);<br>(-)-E-beta-caryophyllene synthase/<br>alpha-humulene synthase                                                       |
| Csa2G000730  | -1.261397239   | 1.56E-07        | Down       | AT4G29260                | short-chain dehydrogenase/reductase (SDR)<br>family protein                                                                                         |
| Csa3G097540  | -1.263655053   | 1.77E-06        | Down       | AT5G23960                | universal stress protein (USP) family protein                                                                                                       |
| Csa7G414490  | -1.265151347   | 2.56E-07        | Down       | AT2G47140                | No hits found                                                                                                                                       |
| Csa4G003620  | -1.283274663   | 9.91E-06        | Down       | AT3G62550                | nodulation protein-related                                                                                                                          |
| Csa4G000810  | -1.288682839   | 5.01E-08        | Down       |                          | GDSL-motif lipase/hydrolase family protein                                                                                                          |
| Csa6G490810  | -1.293945682   | 0.00016859<br>4 | Down       | AT3G50620                | No hits found                                                                                                                                       |
| Csa2G078090  | -1.339898534   | 2.79E-06        | Down       | AT1G29670                | (R)-mandelonitrile lyase, putative /<br>(R)-oxynitrilase, putative                                                                                  |
| Csa7G037610  | -1.35603147    | 2.29E-07        | Down       |                          | ILL6; IAA-amino acid conjugate hydrolase/<br>metallopeptidase                                                                                       |
| Csa2G055560  | -1.360265086   | 2.47E-08        | Down       | AT1G73050                | LSU2 (Response to low sulfur 2)                                                                                                                     |
| Novel1697    | -1.3687947     | 8.04E-07        | Down       |                          | ATPME3; pectinesterase                                                                                                                              |
| Csa6G384060  | -1.388819979   | 0.00027777<br>8 | Down       | AT1G44350                | aspartyl aminopeptidase, putative                                                                                                                   |
| Csa5G139070  | -1.390459477   | 3.17E-06        | Down       | AT5G24660                | HAK5 (High Affinity K <sup>+</sup> Transporter 5);<br>potassium ion transmembrane transporter/<br>potassium:sodium symporter                        |
| Csa7G343870  | -1.405094696   | 3.15E-05        | Down       | AT3G14310                | pathogenesis-related thaumatin family<br>protein                                                                                                    |
| Csa1G002660  | -1.464835304   | 8.38E-09        | Down       | AT5G60160                |                                                                                                                                                     |
| Csa7G395260  | -1.52490111    | 1.01E-08        | Down       | AT4G13420                |                                                                                                                                                     |
| Csa3G743950  | -1.619629633   | 1.67E-07        | Down       | AT1G20030                |                                                                                                                                                     |

| Gene ID     | log2FoldChange | P value     | Regulation | Arabidopsis<br>homologue | Description                                                                                                                                |
|-------------|----------------|-------------|------------|--------------------------|--------------------------------------------------------------------------------------------------------------------------------------------|
| Csa5G478610 | -1.648724682   | 2.81E-10    | Down       | AT1G78950                | beta-amyrin synthase, putative                                                                                                             |
| Csa3G016920 | -1.79255792    | 9.25E-10    | Down       | AT2G38740                | haloacid dehalogenase-like hydrolase family protein                                                                                        |
| Csa5G434550 | -1.848858474   | 2.01E-06    | Down       | AT3G57040                | ARR9 (Response Regulator 9); transcription regulator/ two-component response regulator                                                     |
| Csa7G235250 | -1.851901361   | 0.00025026  | Down       | AT1G31690                | amine oxidase/ copper ion binding / quinone binding                                                                                        |
| Csa3G021150 | -1.880418384   | 0.000132979 | Down       | AT2G45180                | protease inhibitor/seed storage/lipid transfer protein (LTP) family protein                                                                |
| Novel3058   | -1.987994147   | 4.35E-10    | Down       |                          |                                                                                                                                            |
| Csa3G076580 | -2.009731041   | 1.96E-16    | Down       | AT3G20390                | endoribonuclease L-PSP family protein                                                                                                      |
| Csa6G084600 | -2.047491115   | 5.09E-17    | Down       |                          | No hits found                                                                                                                              |
| Csa4G627100 | -2.075416145   | 2.90E-11    | Down       | AT1G78660                | gamma-glutamyl hydrolase, putative / gamma-Glu-X carboxypeptidase, putative / conjugase, putative                                          |
| Csa3G778180 | -2.126134293   | 3.28E-17    | Down       |                          | No hits found                                                                                                                              |
| Csa6G085100 | -2.163933379   | 1.30E-18    | Down       |                          | No hits found                                                                                                                              |
| Csa4G285730 | -2.167378319   | 2.84E-07    | Down       | AT5G06720                | peroxidase, putative                                                                                                                       |
| Csa7G007810 | -2.172784656   | 1.04E-09    | Down       | AT2G21250                | mannose 6-phosphate reductase (NADPH-dependent), putative                                                                                  |
| Csa6G496390 | -2.189068401   | 9.37E-16    | Down       | AT4G37750                | ANT (AINTÉGUMENTA); DNA binding / transcription factor                                                                                     |
| Csa5G139760 | -2.238890468   | 1.34E-10    | Down       | AT5G24090                | acidic endochitinase (CHIB1)                                                                                                               |
| Csa4G031010 | -2.246311048   | 1.01E-06    | Down       | AT5G10180                | AST68; sulfate transmembrane transporter                                                                                                   |
| Csa3G026160 | -2.345224715   | 4.67E-10    | Down       | AT4G01985                | unknown protein                                                                                                                            |
| Csa6G085120 | -2.487665299   | 1.07E-05    | Down       | AT5G44280                | RING1A (RING 1A); protein binding / zinc ion binding                                                                                       |
| Csa5G601500 | -2.639410285   | 8.29E-05    | Down       | AT1G60470                | AtGolS4 (Arabidopsis thaliana galactinol synthase 4); transferase, transferring glycosyl groups / transferase, transferring hexosyl groups |
| Csa3G902910 | -2.64503342    | 5.34E-19    | Down       | AT4G17830                | peptidase M20/M25/M40 family protein                                                                                                       |
| Csa6G448740 | -2.698275654   | 1.77E-27    | Down       | AT3G10050                | OMR1 (L-O-METHYLTHREONINE RESISTANT 1); L-threonine ammonia-lyase                                                                          |
| Csa6G085110 | -2.885621979   | 7.15E-11    | Down       |                          | No hits found                                                                                                                              |
| Csa2G035460 | -2.895733469   | 6.90E-31    | Down       | AT2G24200                | cytosol aminopeptidase                                                                                                                     |
| Csa2G035470 | -2.895931384   | 1.21E-22    | Down       | AT4G30920                | cytosol aminopeptidase family protein                                                                                                      |
| Csa7G072780 | -2.906890596   | 6.38E-09    | Down       | AT2G15220                | secretory protein, putative                                                                                                                |
| Novel2656   | -3.021479727   | 3.70E-09    | Down       |                          |                                                                                                                                            |

| Gene ID     | log2FoldChange | P value         | Regulation | Arabidopsis<br>homologue | Description                                                                                              |
|-------------|----------------|-----------------|------------|--------------------------|----------------------------------------------------------------------------------------------------------|
| Csa3G073840 | -3.639942389   | 1.30E-39        | Down       | AT4G33510                | DHS2 (3-deoxy-d-arabino-heptulosonate<br>7-phosphate synthase);<br>3-deoxy-7-phosphoheptulonate synthase |
| Csa3G625630 | -3.772589504   | 0.00011225<br>3 | Down       | AT5G48850                | ATSDI1 (Sulphur Deficiency-Induced 1);<br>binding                                                        |

**Supplemental Table 6.** qRT-PCR confirmation of differentially expressed genes related to variegated leaf in cucumber obtained by Solexa sequencing

| Gene ID     | Illumina sequencing | qRT-PCR      | Putative annotation                                              |
|-------------|---------------------|--------------|------------------------------------------------------------------|
| Csa2G070310 | 6.40                | 5.67 ± 0.46  | HSP70 (heat shock protein 70)                                    |
| Csa3G180260 | 4.47                | 5.54 ± 0.34  | CBF1 (C-REPEAT/DRE BINDING FACTOR 1)                             |
| Csa7G312930 | 3.87                | 4.67 ± 0.25  | cpHsc70-1 (chloroplast heat shock protein 70-1)                  |
| Csa3G020080 | 3.83                | 3.54 ± 0.21  | ATHSP23.6-MITO(Mitochondrion-l ocalized small heat shock protein |
| Csa3G183950 | 3.67                | 2.42 ± 0.21  | ATHSP90.1 (HEAT SHOCK PROTEIN 90.1)                              |
| Csa1G597730 | 3.55                | 2.17 ± 0.18  | ORA47; DNA binding / transcription factor                        |
| Csa7G072770 | 3.53                | 2.95 ± 0.85  | ATHSP22.0                                                        |
| Csa5G514500 | 3.52                | 2.58 ± 0.26  | HSP70 (heat shock protein 70)                                    |
| Csa6G519700 | 3.43                | 2.52 ± 0.12  | unknown protein                                                  |
| Csa6G513610 | 3.43                | 3.75 ± 0.98  | F-box family protein                                             |
| Csa5G174570 | 3.39                | 3.35 ± 0.27  | CBF4 (C- REPEAT-BINDING FACTOR 4)                                |
| Csa1G589710 | 3.31                | 2.83 ± 0.21  | unknown protein                                                  |
| Csa1G527870 | 3.21                | 2.60 ± 0.37  | HSP18.2 (heat shock protein 18.2)                                |
| Csa5G515060 | 3.14                | 3.56 ± 0.34  | No hits found                                                    |
| Csa4G296260 | 3.14                | 2.63 ± 0.19  | unknown protein                                                  |
| Csa3G207390 | 3.13                | 2.97 ± 0.36  | RRTF1 ({REDOX RESPONSIVE TRANSCRIPTION FACTOR 1)                 |
| Csa3G073840 | -3.64               | -3.30 ± 0.46 | DHS2<br>(3-deoxy-d-arabino-heptulosonate                         |
| Csa3G625630 | -3.77               | -2.79 ± 0.94 | ATSDI1 (SULPHUR DEFICIENCY-INDUCED 1)                            |

**Supplemental Table 7.** HSP and HSF related genes identified from the transcriptome profile analysis of variegated leaf mutant in cucumber

| Gene ID     | Putative function                                               | Arabidopsis homologue | log <sub>2</sub> FoldChange (Csvl versus wild type) | P value         |
|-------------|-----------------------------------------------------------------|-----------------------|-----------------------------------------------------|-----------------|
| Csa2G070310 | HSP70 (heat shock protein 70); ATP binding                      | AT3G12580             | 6.396604781                                         | 3.32E-25        |
| Csa5G514500 | HSP70 (heat shock protein 70); ATP binding                      | AT3G12580             | 3.520341653                                         | 8.86E-33        |
| Csa5G198120 | 17.6 kDa class I small heat shock protein                       | AT1G53540             | 5.672425342                                         | 7.27E-07        |
| Csa5G190530 | 17.6 kDa class I small heat shock protein                       | AT1G53540             | 2.247927513                                         | 1.64E-05        |
| Csa3G020090 | mitochondrion-localized small heat shock protein 23.6           | AT4G25200             | 3.906890596                                         | 4.61E-05        |
| Csa3G020080 | mitochondrion-localized small heat shock protein 23.6           | AT4G25200             | 3.826851098                                         | 3.62E-41        |
| Csa7G312930 | chloroplast heat shock protein 70-1; ATP binding                | AT4G24280             | 3.874469118                                         | 5.75E-05        |
| Csa5G512930 | heat shock cognate protein70-1; ATP binding                     | AT5G02500             | 1.144774476                                         | 6.13E-06        |
| Csa3G183950 | heat shock protein 90.1; ATP binding / unfolded protein binding | AT5G52640             | 3.672860478                                         | 2.86E-25        |
| Csa7G072770 | heat shock protein22.0                                          | AT4G10250             | 3.527247003                                         | 1.10E-10        |
| Csa1G527870 | heat shock protein 18.2                                         | AT5G59720             | 3.209453366                                         | 9.07E-24        |
| Csa1G039100 | heat shock protein101; ATP binding / ATPase/                    | AT1G74310             | 2.947977788                                         | 8.22E-20        |
| Csa5G591720 | heat shock protein 21                                           | AT4G27670             | 1.835337335                                         | 3.85E-12        |
| Csa5G190560 | heat shock protein17.4                                          | AT3G46230             | 1.805415381                                         | 2.33E-10        |
| Csa1G527860 | heat shock protein17.4                                          | AT3G46230             | 1.100424306                                         | 4.54E-05        |
| Csa3G710780 | J8; heat shock protein binding / unfolded protein binding       | AT1G80920             | 1.065687903                                         | 0.0001126<br>81 |
| Csa2G264570 | DNAJ heat shock N-terminal domain-containing protein (J11)      | AT4G36040             | 2.077775155                                         | 1.15E-10        |

**Table S8.** List of selected zinc finger protein related genes identified from the transcriptome profile analysis of variegated leaf mutant in cucumber

| Gene ID     | Putative function                                                                                                              | Arabidopsis<br>homologue | log <sub>2</sub> FoldChange<br>(Cslv1 versus wild<br>type) | P value     |
|-------------|--------------------------------------------------------------------------------------------------------------------------------|--------------------------|------------------------------------------------------------|-------------|
| Csa6G303740 | zinc finger (C2H2 type) family<br>protein                                                                                      | AT2G28710                | 2.887525271                                                | 4.82E-05    |
| Csa2G354820 | salt tolerance zinc finger;<br>nucleic acid binding /<br>transcription factor/<br>transcription repressor/ zinc<br>ion binding | AT1G27730                | 2.143302478                                                | 5.70E-08    |
| Csa4G642460 | salt tolerance zinc finger;<br>nucleic acid binding /<br>transcription factor/<br>transcription repressor/ zinc<br>ion binding | AT1G27730                | 1.497499659                                                | 0.000145303 |
| Csa5G207940 | salt-inducible zinc finger1;<br>transcription factor                                                                           | AT3G55980                | 1.360208928                                                | 2.30E-08    |
| Csa6G405920 | zinc finger (GATA type)<br>family protein                                                                                      | AT1G08010                | 1.446429339                                                | 8.79E-09    |
| Csa6G152950 | zinc finger (AN1-like) family<br>protein                                                                                       | AT2G27580                | 1.281339296                                                | 9.84E-07    |
| Csa6G499220 | zinc finger (C3HC4-type<br>RING finger) family protein                                                                         | AT1G72220                | 1.249556021                                                | 0.0001012   |
